# Supplementary material for: Innovative application of magnetically modified bovine horn as a natural keratin resource in the role of value-added organocatalyst
Source: Royal Society of Chemistry journal article supplement (doi:10.1039/d1ra09327d), 2022-01-01

## Supplementary Information

for

### Innovative Application of Magnetically Modified Bovine Horn as a Natural Keratin Resource in the Role of Value-Added Organocatalyst

Atefeh Darvishi<sup>a</sup>, Hadi Bakhshi<sup>b</sup>, Akbar Heydari<sup>a,\*</sup>

<sup>a</sup> Chemistry Department, Tarbiat Modares University, Tehran, Iran. P.O. Box 14155-4838.

<sup>b</sup> Department of Life Science and Bioprocesses, Fraunhofer Institute for Applied Polymer Research IAP, Geiselbergstraße 69, 14476 Potsdam, Germany.

\* Corresponding author, E-mail: heydar\_a@modares.ac.ir

#### Table of Content

| Content                                                                           | Page |
|-----------------------------------------------------------------------------------|------|
| Spectra information of transamidation reaction derivatives                        | 1-4  |
| FTIR, <sup>1</sup> H-NMR, <sup>13</sup> C-NMR and MS spectra of amide derivatives | 5-26 |

## Spectra information of transamidation reaction derivatives

**N-phenylacetamide (1c):** The product was obtained as white solid in 90% isolated yield; Melting point: 110-112°C; IR (KBr)  $\nu$  ( $\text{cm}^{-1}$ ) = 3293, 2924, 2855, 1662, 1603, 1549, 1495, 1433, 1317, 1259, 753;  $^1\text{H-NMR}$ : (500 MHz,  $\text{DMSO-}d_6$ , 25°C, TMS):  $\delta$  (ppm) = 9.92 (s, 1H), 7.57 (d,  $J$  = 7.5 Hz, 2H), 7.27 (t,  $J$  = 7.5 Hz, 2H), 7.00 (t,  $J$  = 7.5 Hz, 1H), 2.03 (s, 3H).

**N-p-tolylacetamide (2c):** The product was obtained as white solid in 84% isolated yield; Melting point: 142-144°C; IR (KBr)  $\nu$  ( $\text{cm}^{-1}$ ) = 3296, 2930, 2863, 1663, 1607, 820;  $^1\text{H-NMR}$ : (500 MHz,  $\text{CDCl}_3$ , 25°C, TMS):  $\delta$  (ppm) = 7.37 (d,  $J$  = 8.25 Hz, 2H), 7.26 (s, 1H), 7.1 (d,  $J$  = 8.05 Hz, 2H), 2.3 (s, 3H), 2.15 (s, 3H);  $^{13}\text{C-NMR}$  (125 MHz,  $\text{CDCl}_3$ , 25°C, TMS):  $\delta$  (ppm) = 168.32, 135.33, 133.93, 129.52, 120.06, 24.46, 20.83.

**N-(2-mercaptophenyl)acetamide (3c):** The product was obtained as yellow solid in 76% isolated yield; Melting point: 150-152°C; IR (KBr):  $\nu$  ( $\text{cm}^{-1}$ ) = 3275, 2925, 1664, 1575, 1515, 1431, 1290, 752;  $^1\text{H-NMR}$  (500 MHz,  $\text{CDCl}_3$ , 25°C, TMS):  $\delta$  (ppm) = 8.28 (d,  $J$  = 7.45 Hz, 1H), 8.05 (s, 1H), 7.62 (m, 1H), 7.41 (m, 1H), 7.31 (m, 1H), 7.07 (m, 1H), 2.25 (s, 3H).

**N-(4-bromophenyl)acetamide (4c):** The product was obtained as white solid in 92% isolated yield; Melting point: 163-164°C; IR (KBr):  $\nu$  ( $\text{cm}^{-1}$ ) = 3294, 2923, 2854, 1666, 1596, 1003, 920; MS (EI, 70 eV):  $m/z$  (%) = 213 ( $\text{M}^+$ , 77), 178 (100), 145 (12), 143 (12), 119 (6), 92 (67), 91 (36), 65 (46).

**N-benzylacetamide (5c):** The product was obtained as white solid in 95% isolated yield; Melting point: 58-60 °C; IR (KBr):  $\nu$  ( $\text{cm}^{-1}$ ) = 3291, 3084, 2926, 2855, 1641, 1550, 1442, 1366, 1287, 1080, 1025, 742, 693;  $^1\text{H-NMR}$  (400 MHz,  $\text{CDCl}_3$ , 25°C, TMS):  $\delta$  (ppm) = 7.30-7.37 (m, 5H), 5.83 (br s, 1H), 4.45 (s, 2H), 2.05 (s, 3H).

**N-benzylbenzamide (6c):** The product was obtained as white solid in 96% isolated yield; Melting point: 100-102°C; IR (KBr):  $\nu$  ( $\text{cm}^{-1}$ ) = 3293, 2928, 2861, 1641, 1551, 1319, 594;  $^1\text{H-NMR}$  (500 MHz,  $\text{CDCl}_3$ , 25°C, TMS):  $\delta$  (ppm) = 9.07 (t,  $J$  = 5 Hz, 1H), 7.92 (m, 2H), 7.54 (m, 1H), 7.48 (m, 2H), 7.34 (m, 4H), 7.24 (m, 1H), 4.50 (d,  $J$  = 5 Hz, 2H);  $^{13}\text{C-NMR}$  (125 MHz,  $\text{CDCl}_3$ , 25°C, TMS):  $\delta$  (ppm) = 166.68, 140.18, 134.83, 131.70, 128.79, 127.72, 127.67, 127.19, 43.08.

**N-(4-chlorobenzyl)benzamide (7c):** The product was obtained as white solid in 78% isolated yield; IR (KBr)  $\nu$  ( $\text{cm}^{-1}$ ) = 3307, 3073, 2928, 1641, 1549, 1489, 1414, 1317, 1258, 1087, 990, 794, 692;  $^1\text{H-NMR}$  (250 MHz,  $\text{CDCl}_3$ , 25°C, TMS):  $\delta$  (ppm) = 7.72 (d,  $J$  = 8 Hz, 2H), 7.24-7.48 (m, 3H), 7.20 (s, 4H), 7.09 (s, 1H), 4.56 (d,  $J$  = 5.75 Hz, 2H).

**N-(pyridine-3-ylmethyl)benzamide (8c):** The product was obtained as white solid in 75% isolated yield; Melting point: 153-154°C; IR (KBr):  $\nu$  ( $\text{cm}^{-1}$ ) = 3443, 2927, 2859, 1753, 1643, 1539, 1460, 1373, 1264, 1023, 803;  $^1\text{H-NMR}$  (500 MHz,  $\text{CDCl}_3$ , 25°C, TMS):  $\delta$  (ppm) = 8.64 (s,

1H), 8.54 (s, 1H), 7.85 (d,  $J = 7.9$  Hz, 2H), 7.81 (d,  $J = 7.3$  Hz, 1H), 7.51 (t,  $J = 7.45$  Hz, 1H), 7.43 (t,  $J = 7.70$  Hz, 2H), 7.32 (dd,  $J = 7.65, 5.05$  Hz, 1H), 6.70 (s, 1H), 4.64 (d,  $J = 6.1$  Hz, 2H).

**N-benzyl-4-methylbenzamide (9c):** The product was obtained as white solid in 90% isolated yield; Melting point: 148-150°C; IR (KBr):  $\nu$  ( $\text{cm}^{-1}$ ) = 3310, 3065, 3056, 3025, 2916, 1640, 1547, 1420, 1360, 1323, 1257, 1057, 991, 842;  $^1\text{H-NMR}$  (500 MHz,  $\text{CDCl}_3$ , 25°C, TMS):  $\delta$  (ppm) = 9.01 (t,  $J = 5$  Hz, 1H), 7.84 (m, 2H), 7.29 (m, 7H), 4.49 (d,  $J = 5$  Hz, 2H), 2.35 (s, 3H);  $^{13}\text{C-NMR}$  (125 MHz,  $\text{CDCl}_3$ , 25°C, TMS):  $\delta$  (ppm) = 166.58, 141.55, 140.30, 132.06, 129.30, 128.72, 127.76, 127.68, 127.15, 43.04, 21.41.

**N-benzyl-4-chlorobenzamide (10c):** The product was obtained as white solid in 87% isolated yield; Melting point: 157-160°C; IR (KBr):  $\nu$  ( $\text{cm}^{-1}$ ) = 3313, 3083, 3030, 1630, 1594, 1553, 1486, 1420, 1319, 1092, 849;  $^1\text{H-NMR}$  (500 MHz,  $\text{CDCl}_3$ , 25°C, TMS):  $\delta$  (ppm) = 9.15 (t,  $J = 5$  Hz, 1H), 7.94 (d,  $J = 10$  Hz, 2H), 7.55 (d,  $J = 5$  Hz, 2H), 7.33 (d,  $J = 5$  Hz, 4H), 7.25 (q,  $J = 5$  Hz, 1H), 4.50 (d,  $J = 5$  Hz, 2H);  $^{13}\text{C-NMR}$  (125 MHz,  $\text{CDCl}_3$ , 25°C, TMS):  $\delta$  (ppm) = 165.65, 139.96, 136.57, 133.55, 129.68, 128.87, 128.76, 127.72, 127.25, 43.18.

**N-benzyl-2-chlorobenzamide (11c):** The product was obtained as white solid 79% isolated yield; Melting point: 158-161°C; IR (KBr):  $\nu$  ( $\text{cm}^{-1}$ ) = 3254, 3087, 3031, 2920, 2862, 1635, 1594, 1555, 1429, 1362, 1256, 1049, 767;  $^1\text{H-NMR}$  (500 MHz,  $\text{CDCl}_3$ , 25°C, TMS):  $\delta$  (ppm) = 9.01 (t,  $J = 5$  Hz, 1H), 7.42 (m, 9H), 4.49 (d,  $J = 5$  Hz, 2H);  $^{13}\text{C-NMR}$  (125 MHz,  $\text{CDCl}_3$ , 25°C, TMS):  $\delta$  (ppm) = 166.91, 139.63, 137.41, 131.23, 130.39, 130.10, 129.35, 128.78, 127.68, 127.58, 127.30, 42.95.

**N-benzyl-4-nitrobenzamide (12c):** The product was obtained as white solid 79% isolated yield; Melting point: 190-193°C; IR (KBr):  $\nu$  ( $\text{cm}^{-1}$ ) = 3430, 2252, 2125, 1619, 1584, 1341, 1026, 824, 762.  $^1\text{H-NMR}$  (500 MHz,  $\text{CDCl}_3$ , 25°C, TMS):  $\delta$  (ppm) = 9.15 (t,  $J = 5$  Hz, 1H), 7.94 (d,  $J = 10$  Hz, 2H), 7.55 (d,  $J = 10$  Hz, 2H), 7.33 (d,  $J = 5$  Hz, 4H), 7.25 (q,  $J = 5$  Hz, 1H), 4.50 (d,  $J = 5$  Hz, 2H);  $^{13}\text{C-NMR}$  (125 MHz,  $\text{CDCl}_3$ , 25°C, TMS):  $\delta$  (ppm) = 168.41, 148.48, 145.89, 135.69, 130.47, 129.20, 128.94, 128.51, 123.22, 42.76.

**N-propylbenzamide (13c):** The product was obtained as white solid 91% isolated yield; Melting point: 105-107°C; IR (KBr):  $\nu$  ( $\text{cm}^{-1}$ ) = 3302, 3083, 2956, 2932, 2871, 1633, 1549, 1492, 1327, 1289, 1028, 803, 598;  $^1\text{H-NMR}$  (500 MHz,  $\text{CDCl}_3$ , 25°C, TMS):  $\delta$  (ppm) = 8.45 (t,  $J = 5$  Hz, 1H), 7.85 (d,  $J = 10$  Hz, 2H), 7.48 (m, 3H), 3.23 (m, 2H), 1.54 (m, 2H), 0.89 (m, 3H);  $^{13}\text{C-NMR}$  (125 MHz,  $\text{CDCl}_3$ , 25°C, TMS):  $\delta$  (ppm) = 166.6, 135.2, 131.4, 128.6, 127.5, 41.4, 22.9, 11.9.

**Phenyl(piperidin-1-yl)methanone (14c):** The product was obtained 70% isolated yield; IR (KBr):  $\nu$  ( $\text{cm}^{-1}$ ) = 3059, 2931, 2858, 1625, 1565, 1433, 1277;  $^1\text{H-NMR}$  (250 MHz,  $\text{CDCl}_3$ , 25°C, TMS):  $\delta$  (ppm) = 7.39 (s, 5H), 3.72 (s, 2H), 3.35 (s, 2H), 1.42-1.68 (m, 6H);  $^{13}\text{C-NMR}$  (62.9 MHz,  $\text{CDCl}_3$ , 25°C, TMS):  $\delta$  (ppm) = 170.4, 136.6, 129.5, 128.5, 126.9, 48.8, 43.2, 26.8, 25.8, 24.7; MS (EI, 70 eV):  $m/z$  (%) = 189 ( $\text{M}^+$ , 18), 160 (4), 133 (4), 111 (46), 105 (86), 84 (18), 77 (100).

**4-benzoylmorpholin (15c):** The product was obtained as colorless liquid 80% isolated yield; IR (KBr):  $\nu$  ( $\text{cm}^{-1}$ ) = 3296, 2956, 2927, 2867, 1637, 1535, 1454, 1048;  $^1\text{H-NMR}$ : (250 MHz,  $\text{CDCl}_3$ , 25°C, TMS):  $\delta$  (ppm) = 7.40 (s, 5H), 3.70 (br s, 2H), 3.46 (br s, 2H);  $^{13}\text{C-NMR}$  (62.9 MHz,  $\text{CDCl}_3$ , 25°C, TMS):  $\delta$  (ppm) = 170.6, 135.4, 130.0, 128.7, 127.2, 67.0, 48.2, 42.7; MS (EI, 70 eV):  $m/z$  (%) = 191 ( $\text{M}^+$ , 8), 176 (5), 148 (5), 114 (5), 105 (100), 86 (11), 77 (87).

***N*-(1-phenylethyl)benzamide (16c):** The product was obtained as white solid 80% isolated yield; Melting point: 128-129°C; IR (KBr):  $\nu$  ( $\text{cm}^{-1}$ ) = 3329, 3030, 2967, 1635, 1525, 1449, 1080;  $^1\text{H-NMR}$  (400 MHz,  $\text{CDCl}_3$ , 25°C, TMS):  $\delta$  (ppm) = 7.79-7.81 (m, 2H), 7.30-7.54 (m, 8H), 6.34 (d,  $J$  = 5.2 Hz, 1H), 5.32-5.41 (m, 2H), 1.64 (d,  $J$  = 7.2 Hz, 3H);  $^{13}\text{C-NMR}$  (100 MHz,  $\text{CDCl}_3$ , 25°C, TMS):  $\delta$  (ppm) = 166.6, 143.1, 134.6, 131.5, 128.8, 128.6, 127.5, 126.9, 126.3, 49.2, 21.7; MS (EI, 70 eV):  $m/z$  (%) = 225 ( $\text{M}^+$ , 40), 210 (12), 120 (10), 105 (100), 91 (3), 77 (80).

**4-methyl-*N*-(1-phenylethyl)benzamide (17c):** The product was obtained as white solid 83% isolated yield; IR (KBr):  $\nu$  ( $\text{cm}^{-1}$ ) = 3331, 3032, 2973, 2925, 1632, 1522, 1450, 1270;  $^1\text{H-NMR}$  (250 MHz,  $\text{CDCl}_3$ , 25°C, TMS):  $\delta$  (ppm) = 7.77 (d,  $J$  = 7.7 Hz, 2H), 7.31-7.47 (m, 7H), 6.31 (br s, 1H), 5.31-5.37 (m, 1H), 2.41 (s, 3H), 1.61 (d,  $J$  = 6.7 Hz, 3H).

**4-methoxy-*N*-(1-phenylethyl)benzamide (18c):** The product was obtained as white solid 87% isolated yield; IR (KBr):  $\nu$  ( $\text{cm}^{-1}$ ) = 3434, 3337, 2818, 2849, 1622, 1526, 1502, 1257;  $^1\text{H-NMR}$  (250 MHz,  $\text{CDCl}_3$ , 25°C, TMS):  $\delta$  (ppm) = 7.74 (d,  $J$  = 8.7 Hz, 2H), 7.30-7.39 (m, 5H), 6.89-6.93 (m, 2H), 6.23 (br s, 1H), 5.31-5.36 (m, 1H), 3.84 (s, 3H), 1.60 (d,  $J$  = 6.7 Hz, 3H).

**4-chloro-*N*-(1-phenylethyl)benzamide (19c):** The product was obtained as white solid 78% isolated yield; IR (KBr):  $\nu$  ( $\text{cm}^{-1}$ ) = 3421, 3338, 2980, 1636, 1529, 1485, 1268;  $^1\text{H-NMR}$  (250 MHz,  $\text{CDCl}_3$ , 25°C, TMS):  $\delta$  (ppm) = 7.71 (d,  $J$  = 8.2 Hz, 2H), 7.30-7.40 (m, 7H), 6.39 (br s, 1H), 5.28-5.34 (m, 1H), 1.60 (d,  $J$  = 7.0, 3H).

***N*-phenylbenzamide (20c):** The product was obtained as white solid 81% isolated yield; Melting point: 162-164°C; IR (KBr):  $\nu$  ( $\text{cm}^{-1}$ ) = 3343, 3051, 1655, 1599, 1532, 1437, 1321, 1259, 884, 750, 715, 590;  $^1\text{H-NMR}$  (500 MHz,  $\text{CDCl}_3$ , 25°C, TMS):  $\delta$  (ppm) = 9.30 (s, 1H), 7.8 (t,  $J$  = 10 Hz, 2H), 7.62 (d,  $J$  = 5 Hz, 2H), 7.37 (m, 1H), 7.30 (m, 2H), 7.19 (t,  $J$  = 5 Hz, 2H), 6.97 (t,  $J$  = 5 Hz, 1H);  $^{13}\text{C-NMR}$  (125 MHz,  $\text{CDCl}_3$ , 25°C, TMS):  $\delta$  (ppm) = 166.3, 138.7, 135.3, 131.4, 128.6, 128.3, 127.5, 124.0, 120.6.

**4-methyl-*N*-phenylbenzamide (21c):** The product was obtained as white solid 76% isolated yield; Melting point: 146-148°C; IR (KBr):  $\nu$  ( $\text{cm}^{-1}$ ) = 3351, 3057, 2916, 1649, 1596, 1524, 1438, 1320, 1260, 885, 747, 588;  $^1\text{H-NMR}$  (500 MHz,  $\text{CDCl}_3$ , 25°C, TMS):  $\delta$  (ppm) = 10.20 (s, 1H), 7.88 (m, 4H), 7.35 (m, 4H), 7.10 (m, 1H), 2.38 (s, 3H);  $^{13}\text{C-NMR}$  (125 MHz,  $\text{CDCl}_3$ , 25°C, TMS):  $\delta$  (ppm) = 165.8, 142.0, 139.7, 132.5, 129.3, 129.0, 128.2, 124.0, 120.8, 21.4.

**4-chloro-*N*-phenylbenzamide (22c):** The product was obtained as white solid 75% isolated yield; Melting point: 197-200°C; IR (KBr):  $\nu$  ( $\text{cm}^{-1}$ ) = 3351, 3083, 3056, 1653, 1597, 1528,

1438, 1324, 1258, 1092, 847, 755, 589; <sup>1</sup>H-NMR (500 MHz, CDCl<sub>3</sub>, 25°C, TMS): δ (ppm) = 10.33 (s, 1H), 8.01 (m, 2H), 7.79 (m, 2H), 7.60 (m, 2H), 7.36 (m, 2H), 7.11 (m, 1H); <sup>13</sup>C-NMR (125 MHz, CDCl<sub>3</sub>, 25°C, TMS): δ (ppm) = 164.9, 139.4, 136.9, 134.1, 130.1, 129.1, 128.9, 124.3, 120.9.

**2-chloro-N-phenylbenzamide (23c):** The product was obtained as white solid 71% isolated yield; Melting point: 150-151°C; IR (KBr): ν (cm<sup>-1</sup>) = 3238, 3187, 3134, 3078, 2980, 1651, 1599, 1546, 1488, 1329, 1262, 1123, 1049, 768, 691; <sup>1</sup>H-NMR (500 MHz, CDCl<sub>3</sub>, 25°C, TMS): δ (ppm) = 10.52 (s, 1H), 7.76 (d, *J* = 5 Hz, 2H), 7.59 (m, 2H), 7.50 (m, 2H), 7.37 (t, *J* = 5 Hz, 2H), 7.13 (t, *J* = 5 Hz, 1H); <sup>13</sup>C-NMR (125 MHz, CDCl<sub>3</sub>, 25°C, TMS): δ (ppm) = 165.4, 139.4, 137.5, 131.5, 130.4, 130.1, 129.4, 129.2, 127.7, 124.3, 120.1.

**4-nitro-N-phenylbenzamide (24c):** The product was obtained as white solid 72% isolated yield; Melting point: 181-182°C; IR (KBr): ν (cm<sup>-1</sup>) = 3321, 3110, 1621, 1592, 1523, 1407, 1351, 1317, 1262, 1105, 832, 724, 506. <sup>1</sup>H-NMR (500 MHz, CDCl<sub>3</sub>, 25°C, TMS): δ (ppm) = 10.93 (s, 1H), 8.33 (d, *J* = 10 Hz, 2H), 8.27 (d, *J* = 10 Hz, 2H), 7.85 (d, *J* = 10 Hz, 2H), 7.36 (t, *J* = 5 Hz, 2H), 7.13 (t, *J* = 5 Hz, 1H); <sup>13</sup>C-NMR (125 MHz, CDCl<sub>3</sub>, 25°C, TMS): δ (ppm) = 168.47, 164.37, 149.5, 148.3, 146.7, 141.1, 139.3, 130.5, 129.8, 129.1, 124.5, 123.9, 123.1, 121.1.

**1,3-diphenylurea (25c):** The product was obtained as white solid 86% isolated yield; Melting point: 238-241°C; IR (KBr): ν (cm<sup>-1</sup>) = 3323, 1645, 1599, 1549, 1439, 1306, 1230.

**1,3-bis(1-phenylethyl)urea (26c):** The product was obtained as white solid 90% isolated yield; IR (KBr): ν (cm<sup>-1</sup>) = 3329, 2969, 1626, 1575, 1447, 1248, 1115; <sup>1</sup>H-NMR (400 MHz, CDCl<sub>3</sub>, 25°C, TMS): δ (ppm) = 7.27-7.31 (m, 10H), 5.99 (br s, 2H), 4.79 (q, *J* = 8.0 Hz, 2H), 1.43 (d, *J* = 8.0 Hz, 6H).

**1,3-diphenylthiourea (27c):** The product was obtained as white solid 80% isolated yield; Melting point: 153-155°C; IR (KBr): ν (cm<sup>-1</sup>) = 3204, 3020, 1545, 1449, 1339, 1234, 1068; <sup>1</sup>H-NMR (500 MHz, DMSO-*d*<sub>6</sub>, 25°C, TMS): δ (ppm) = 9.79 (s, 2H), 7.47 (t, *J* = 7.5 Hz, 2H), 7.32 (t, *J* = 7.5 Hz, 2H), 7.11 (t, *J* = 7.5 Hz, 1H).

# $^1\text{H-NMR}$ , $^{13}\text{C-NMR}$ and mass spectra of amide derivatives

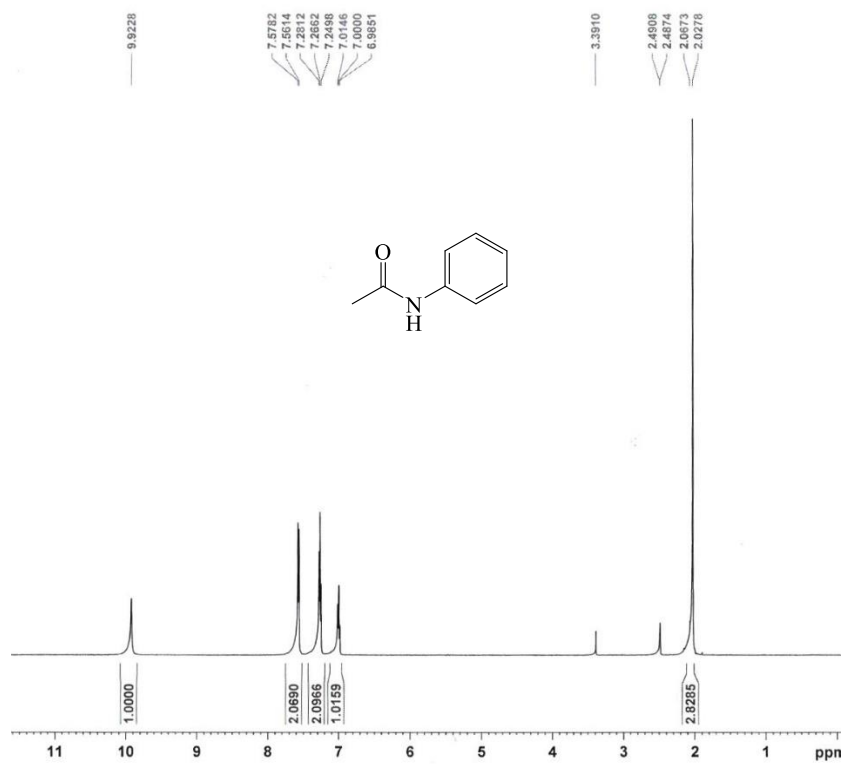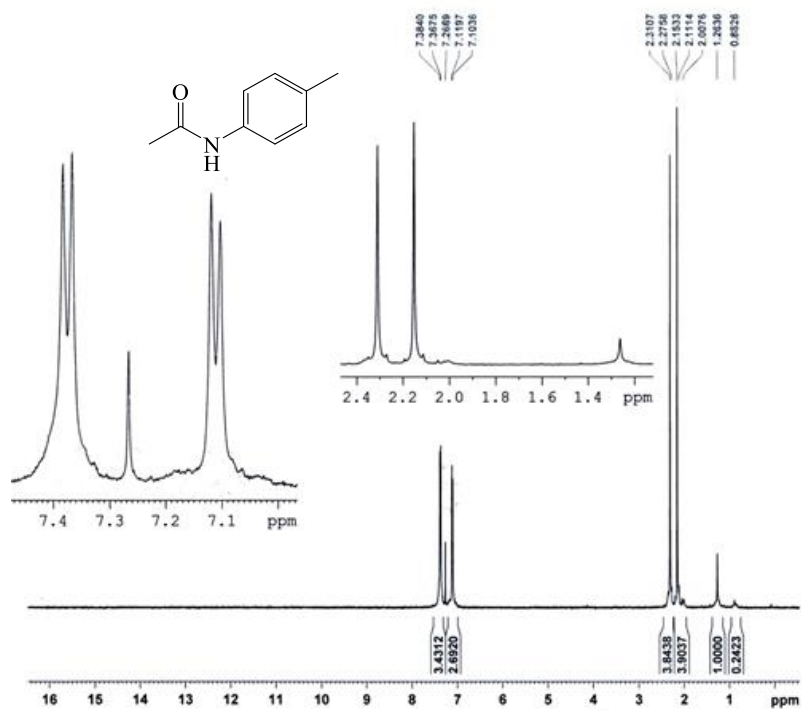

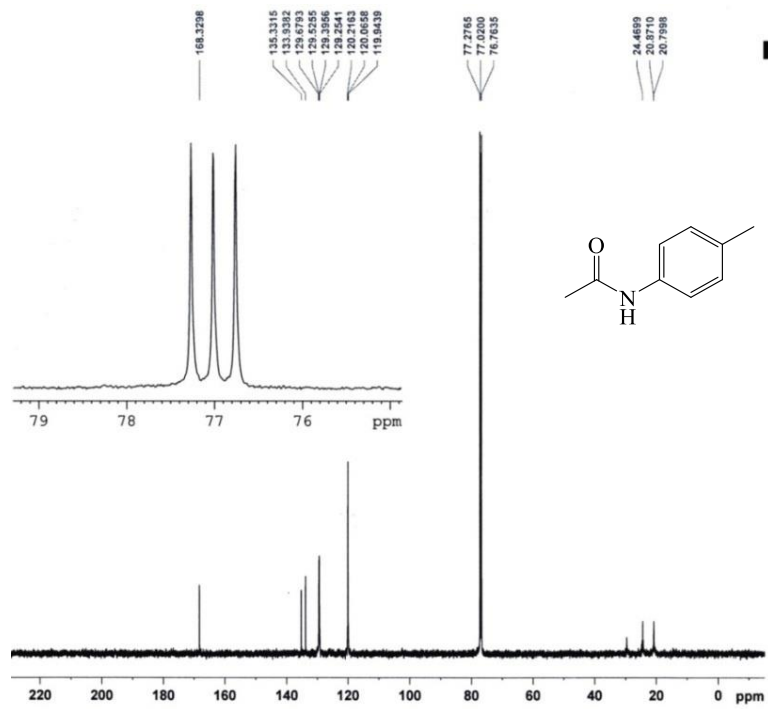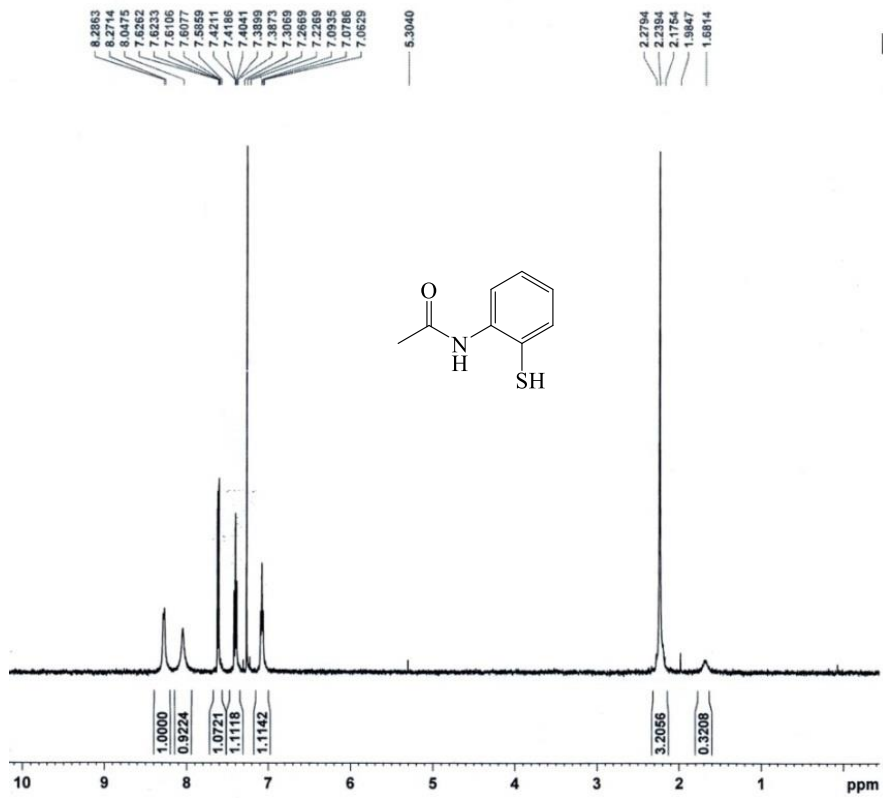

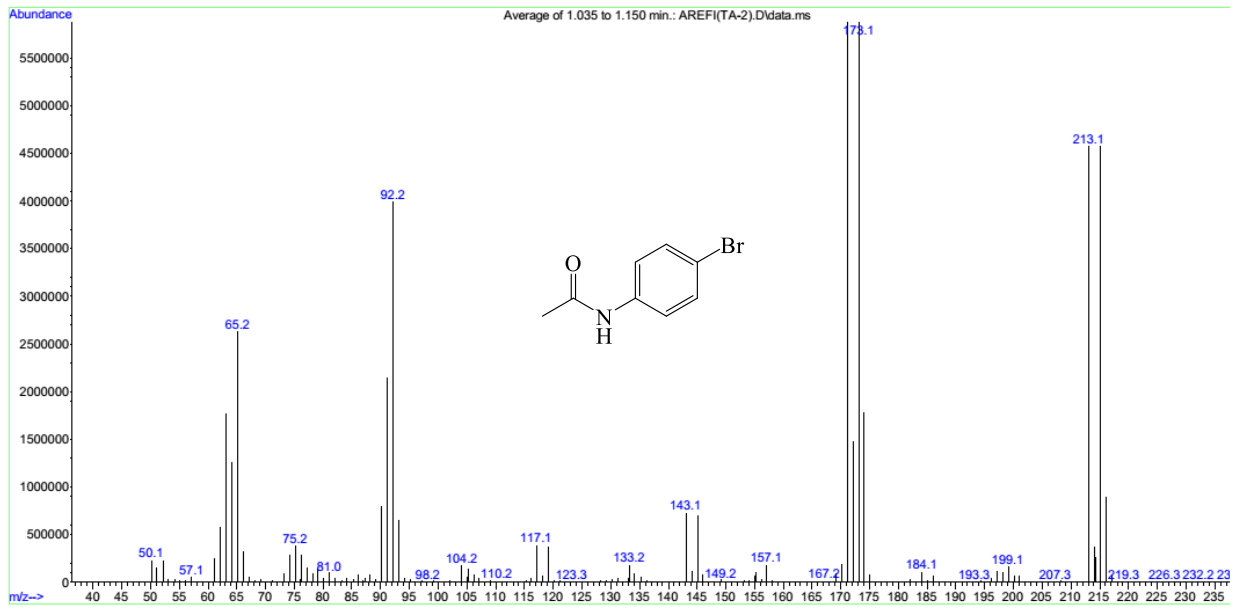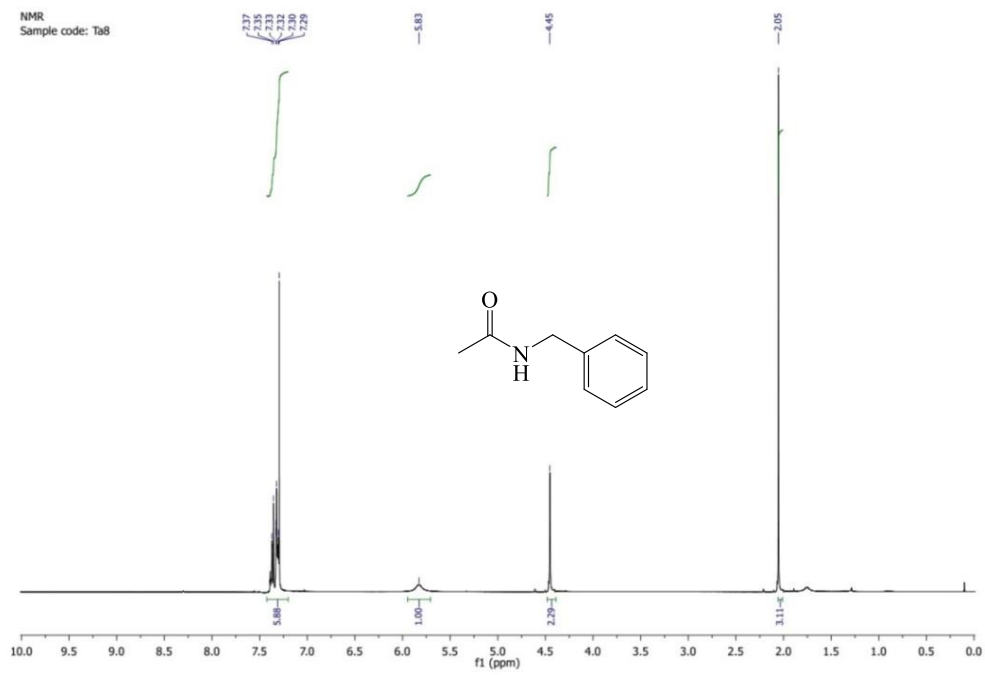



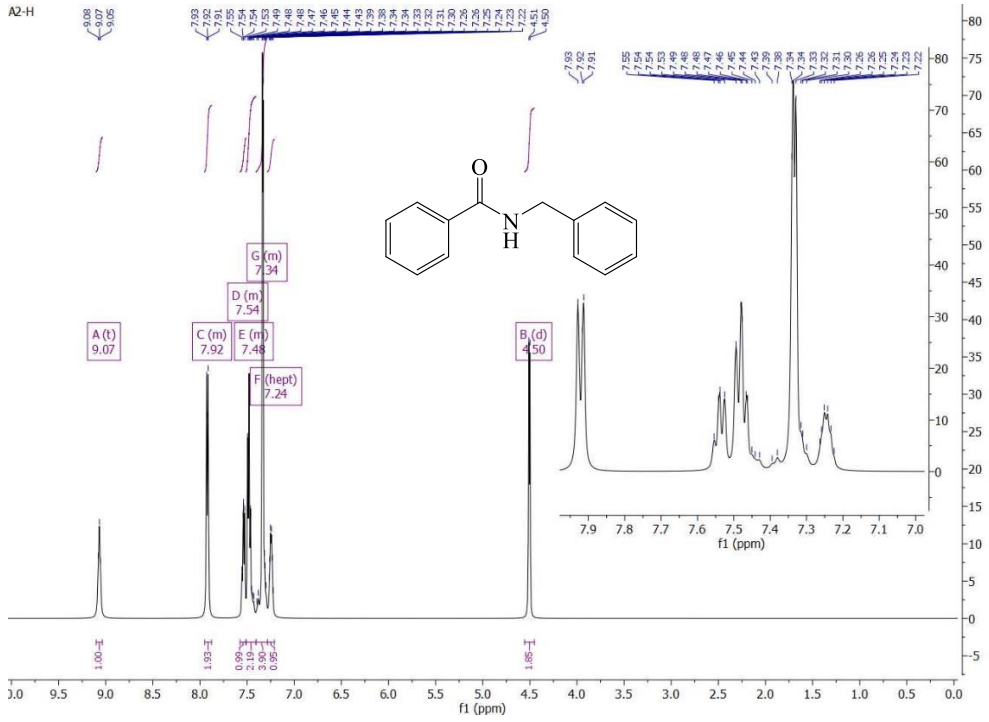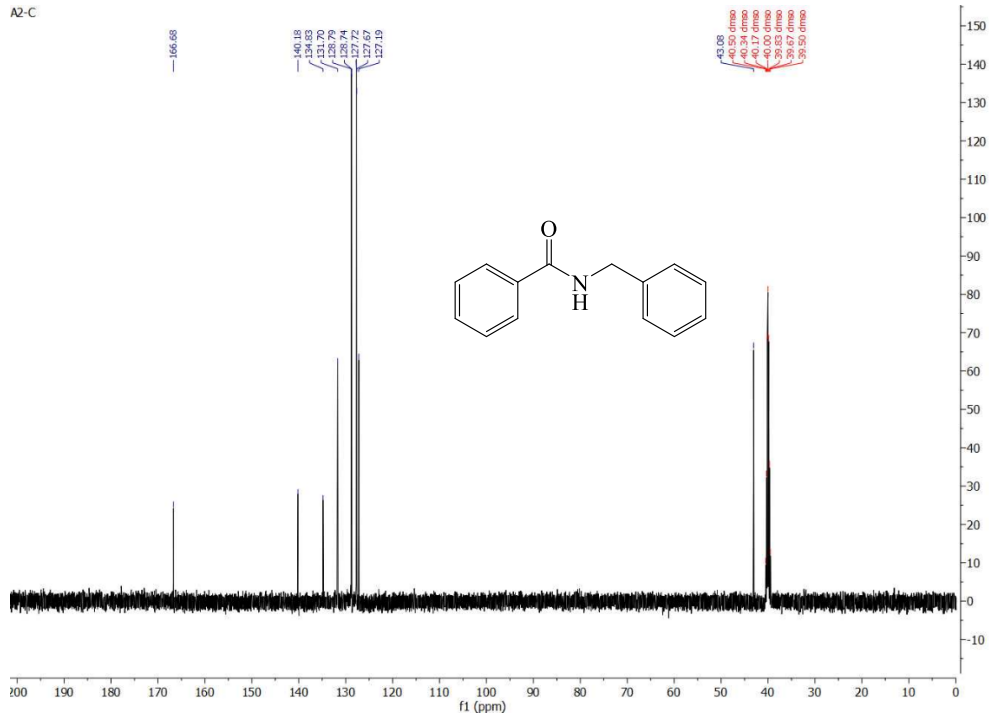

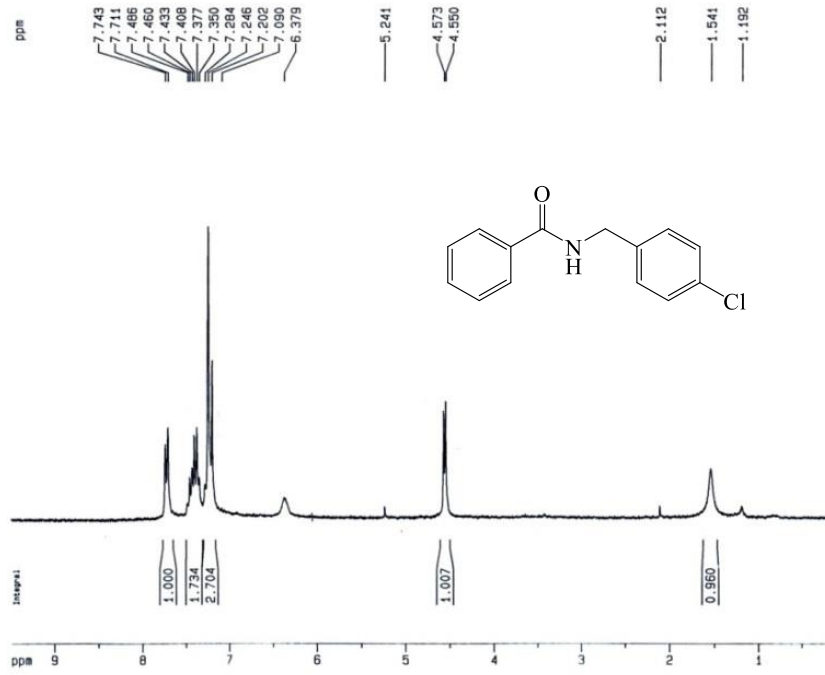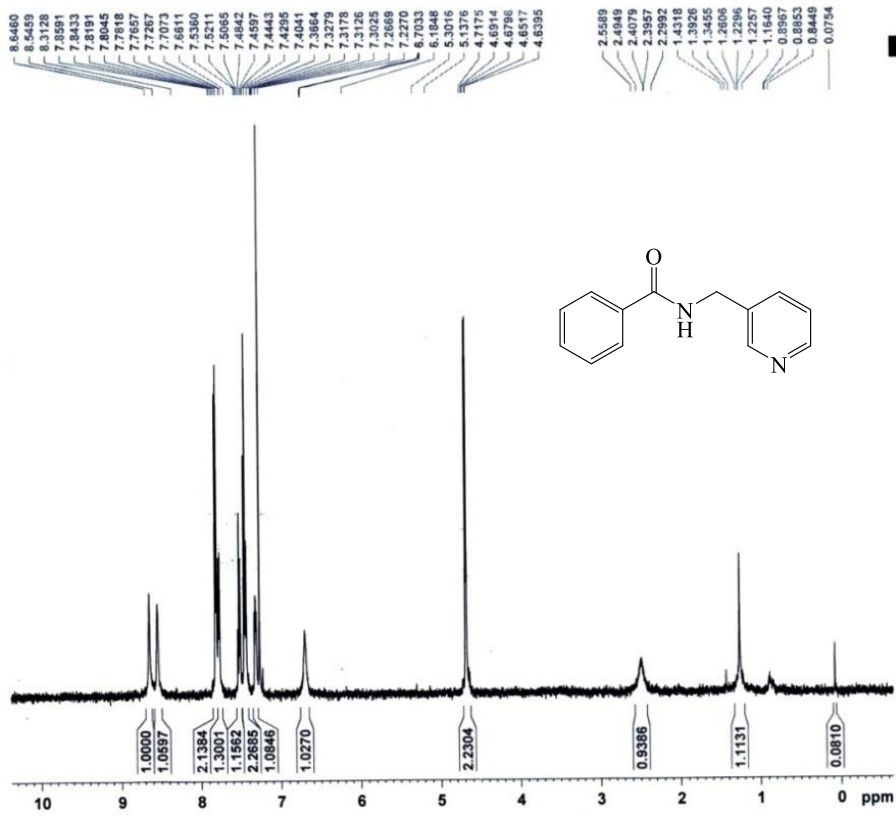



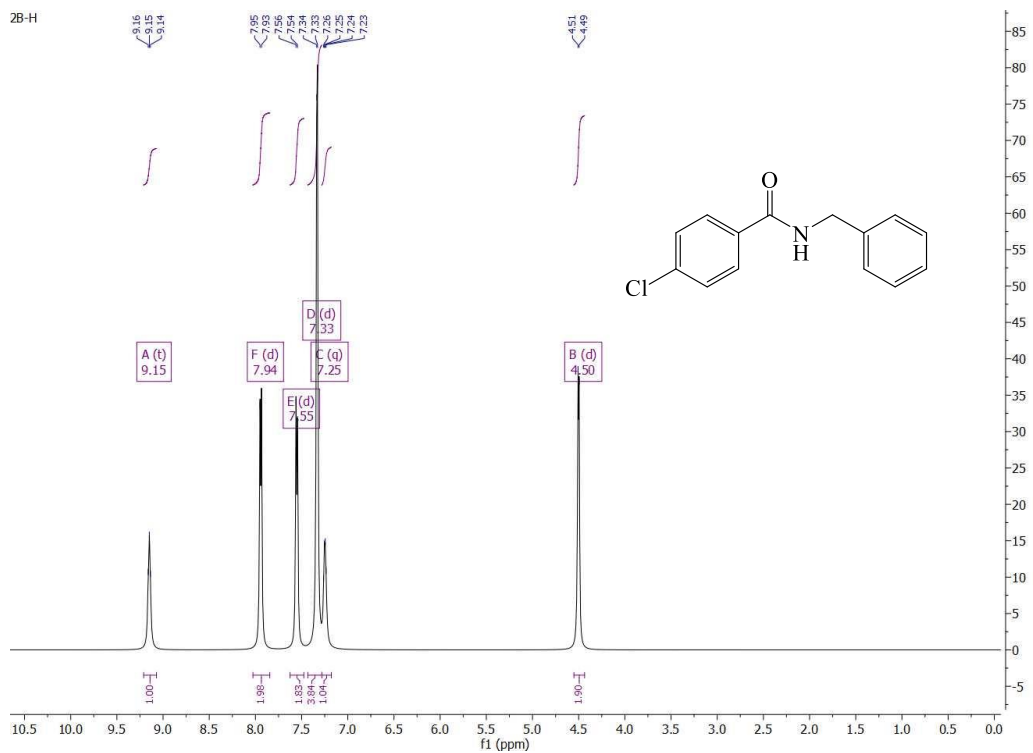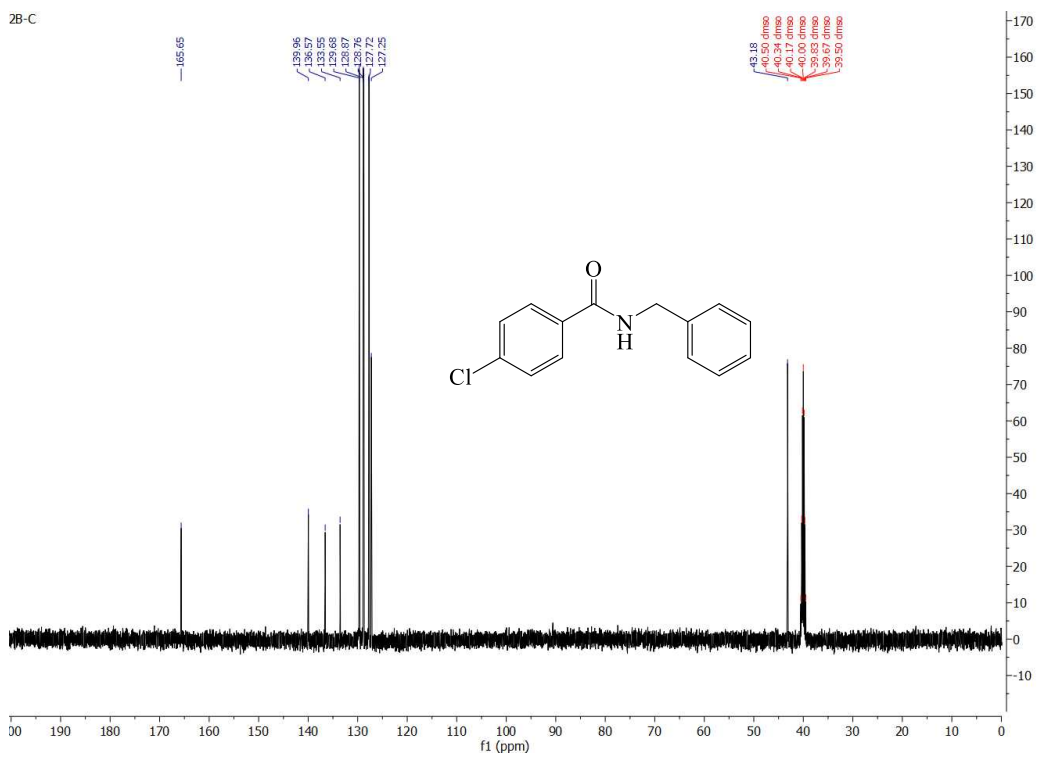

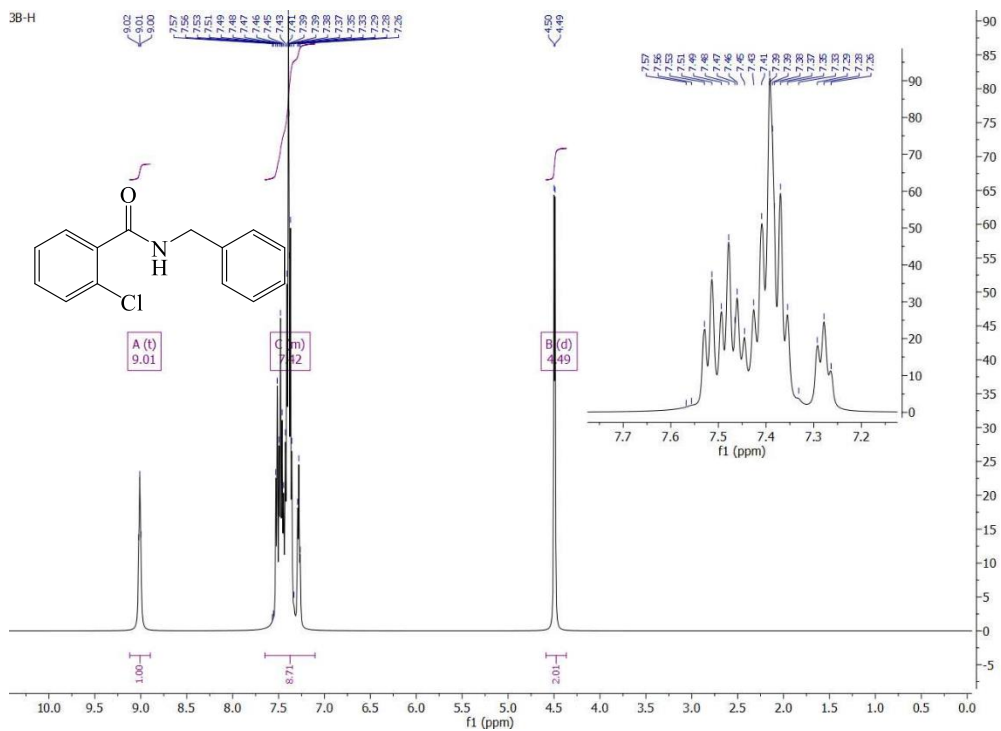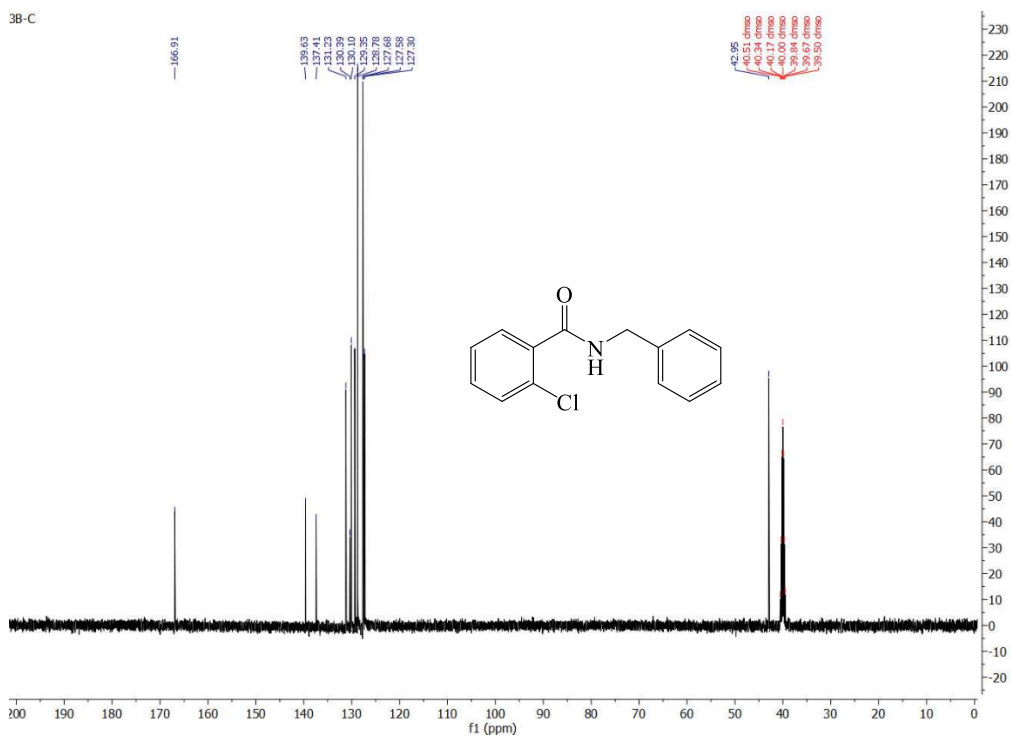



AB-H

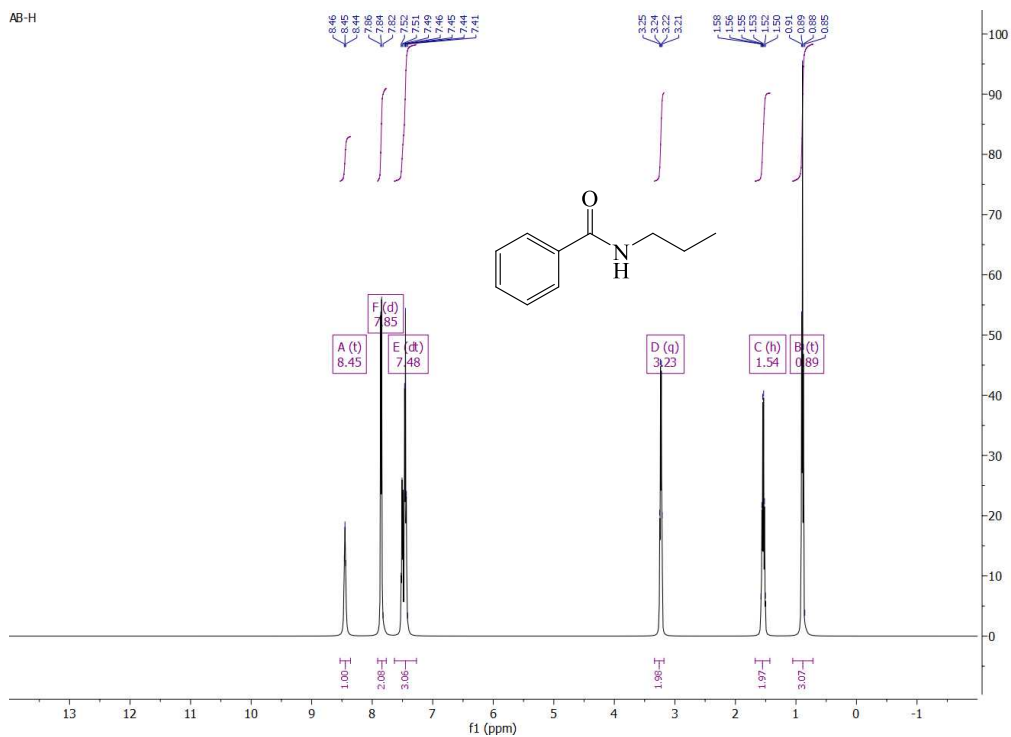

AB-C

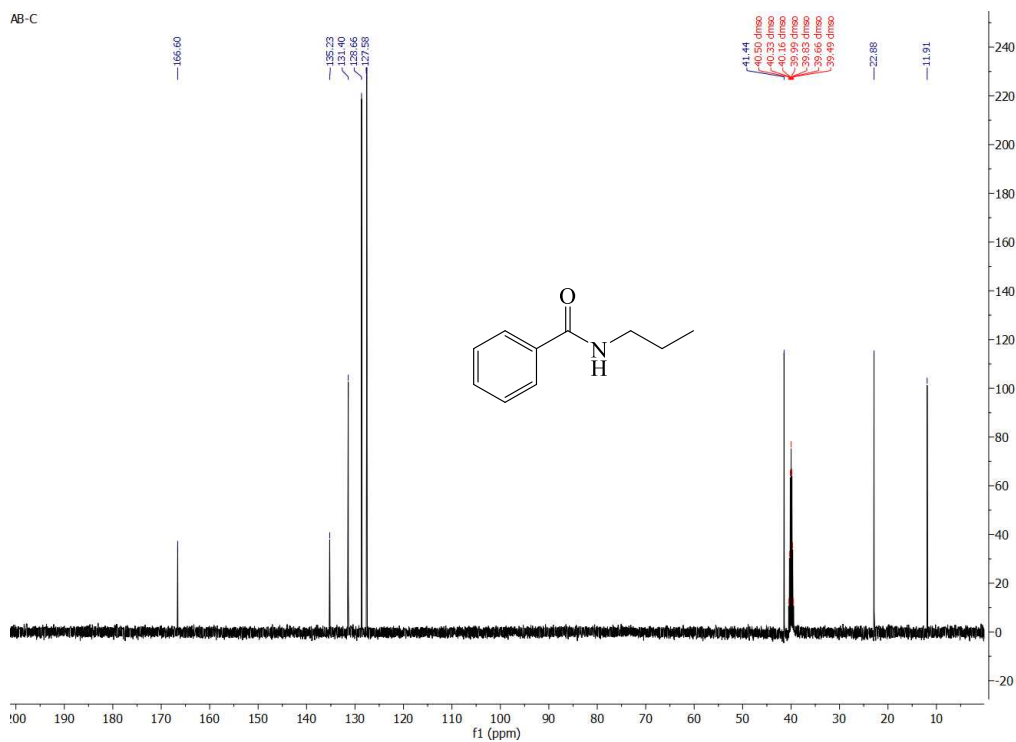

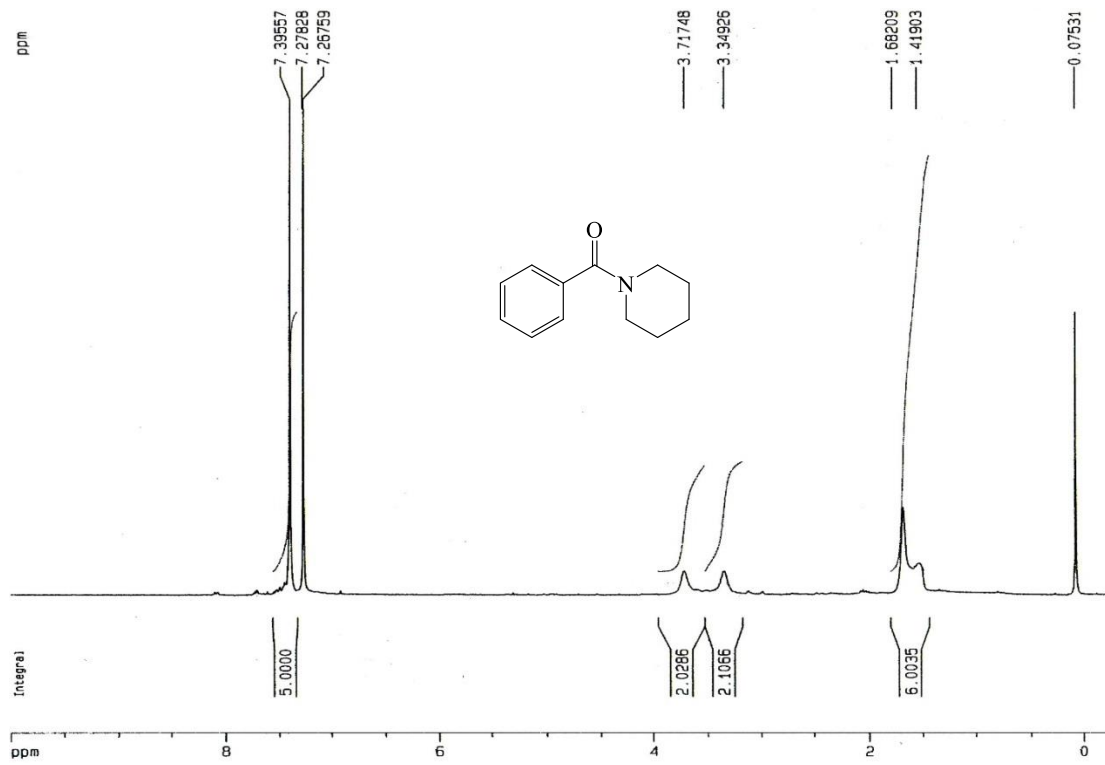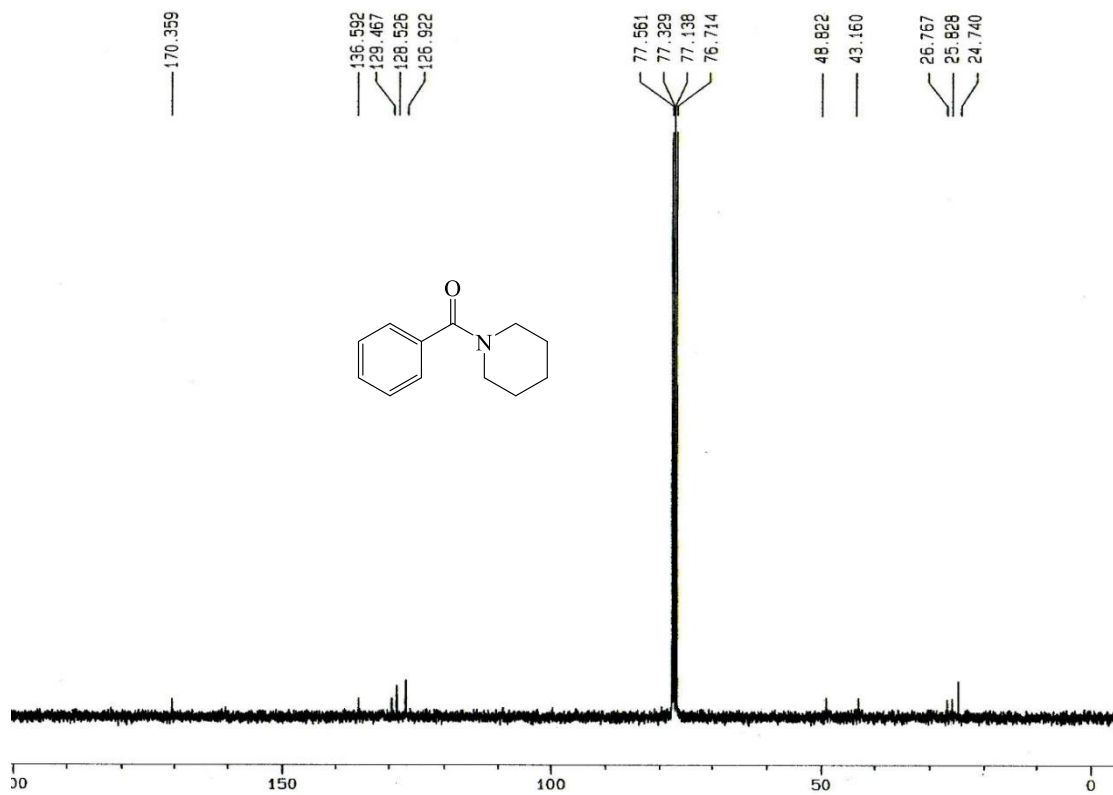



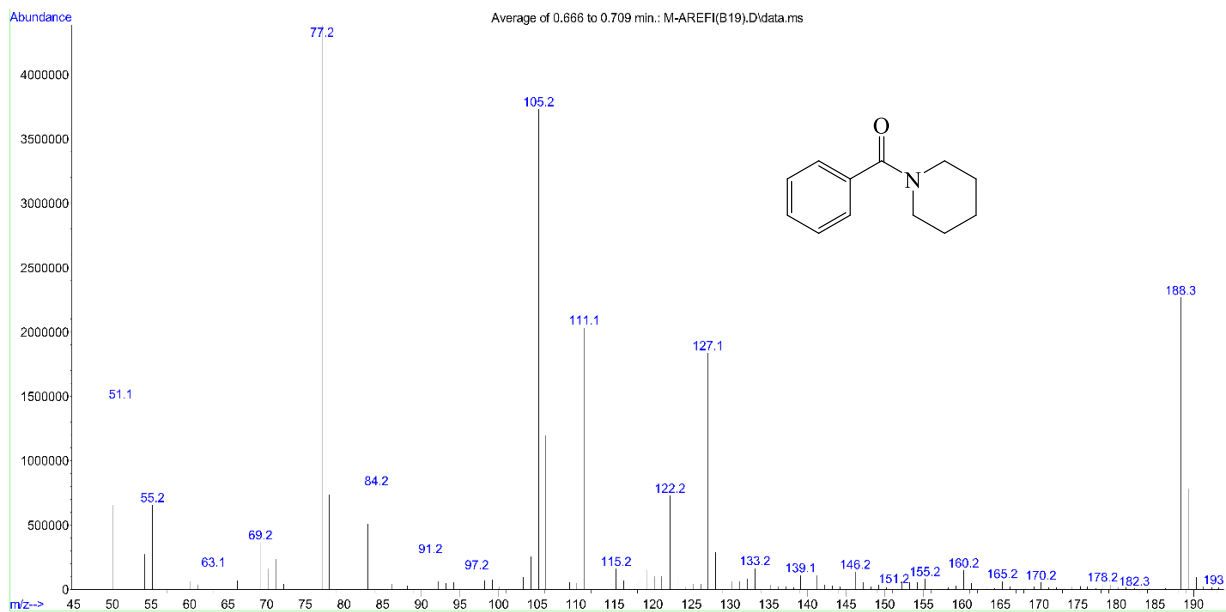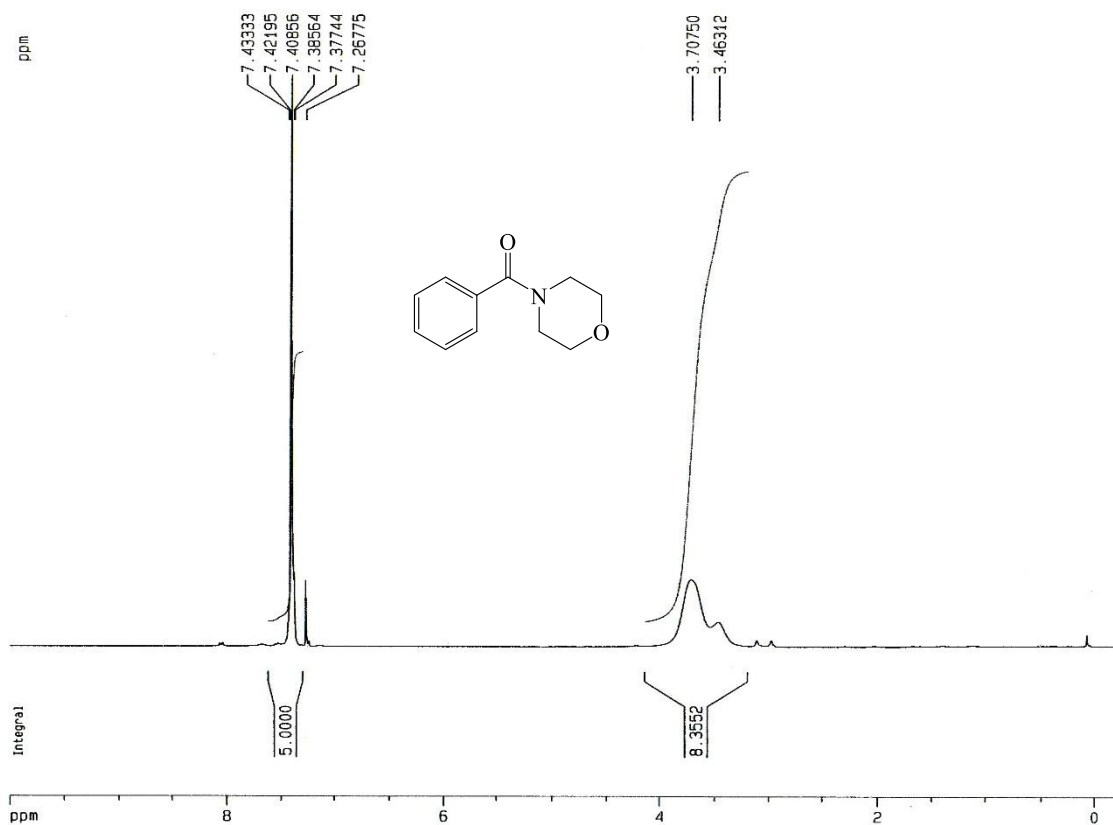

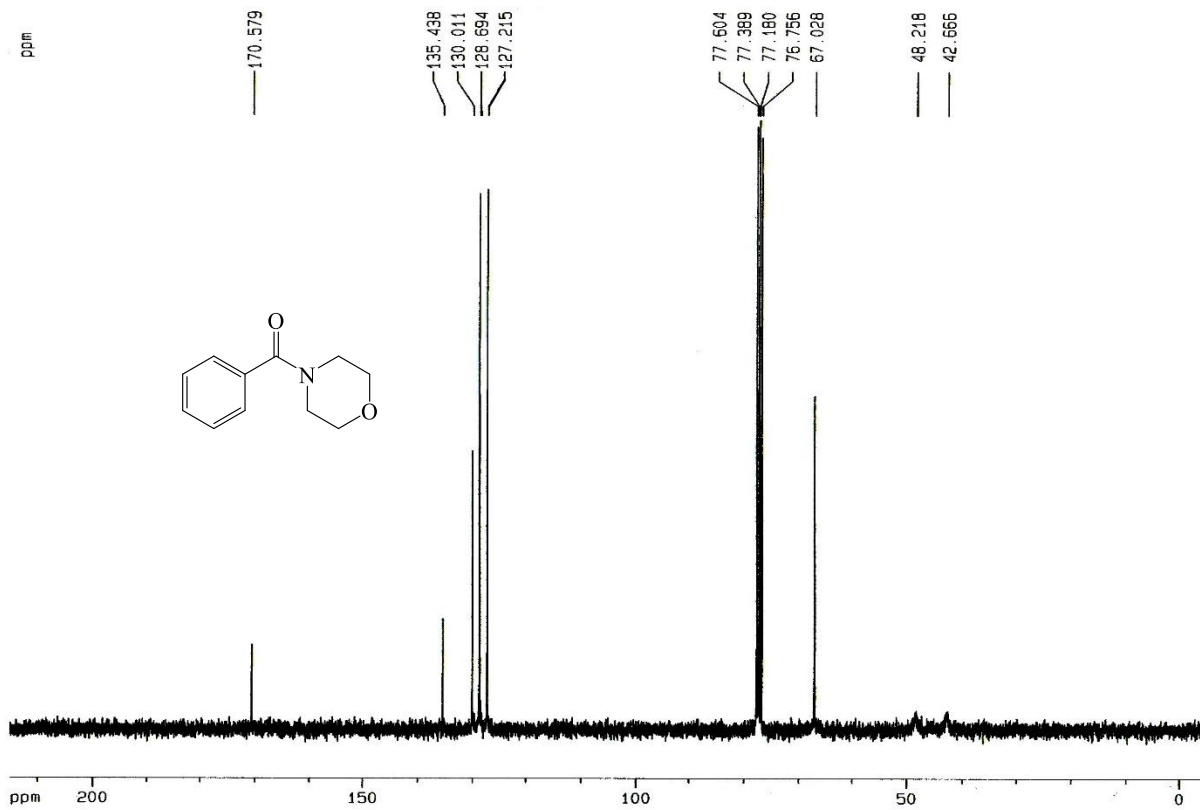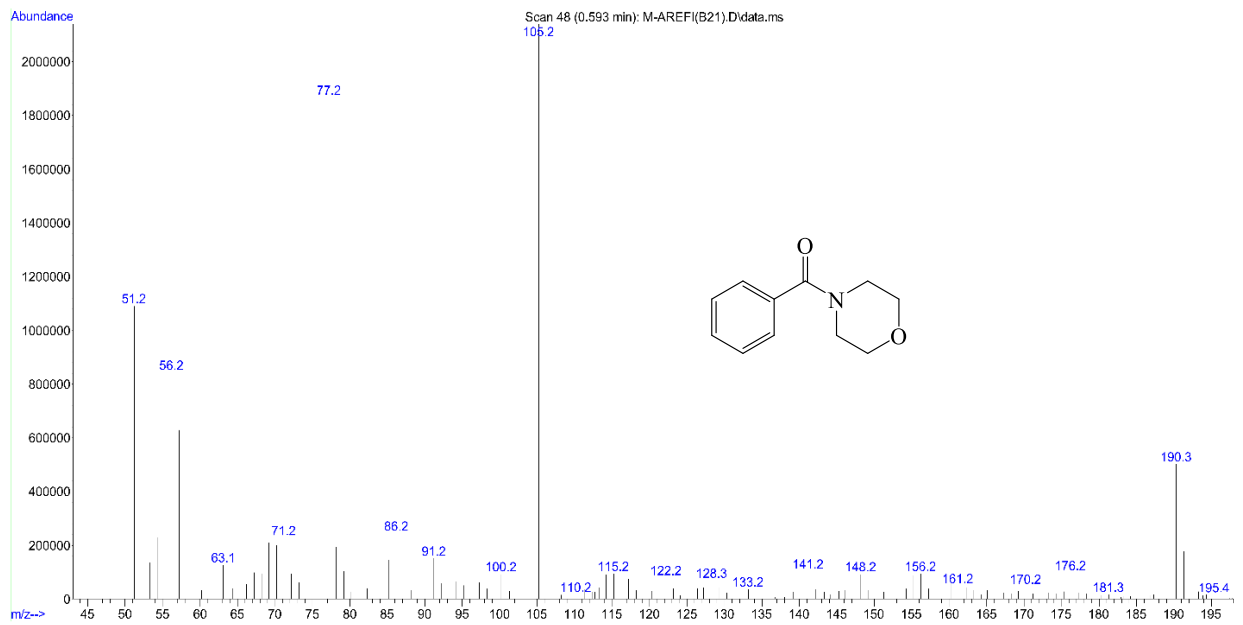

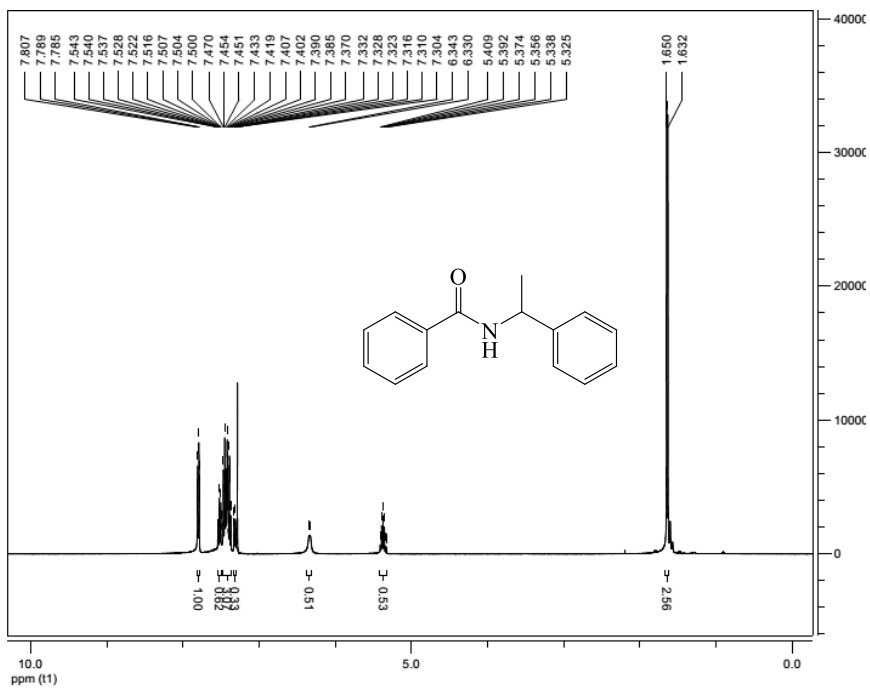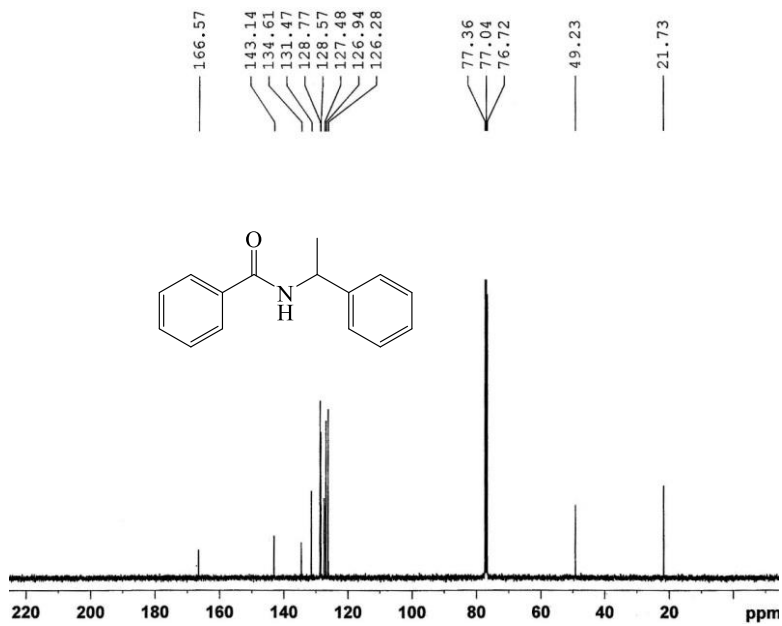

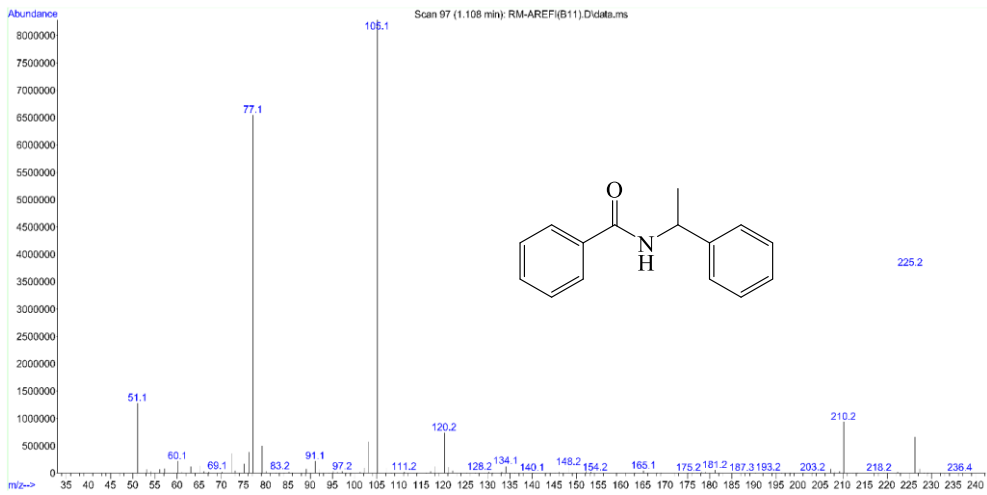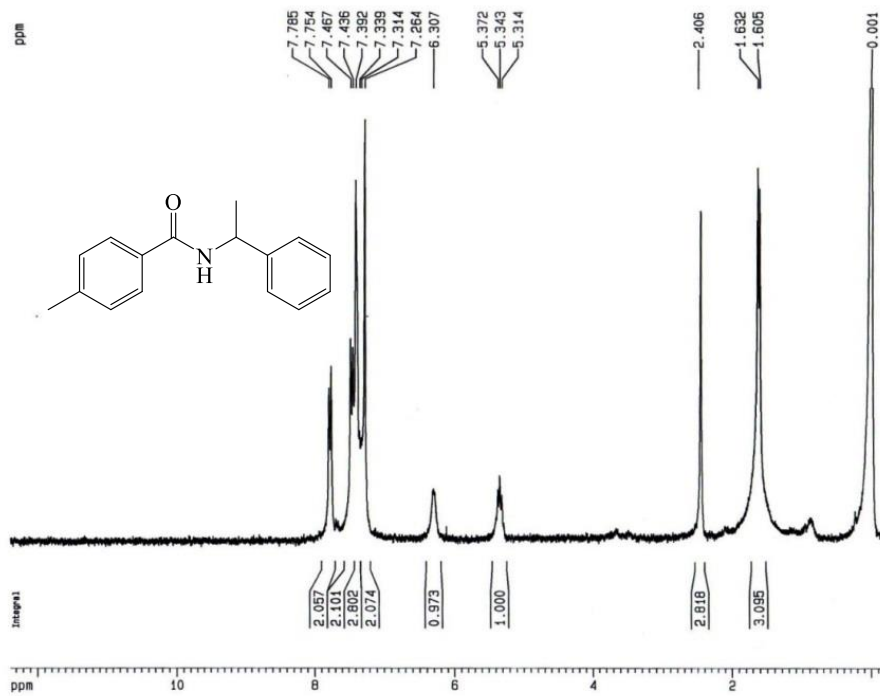

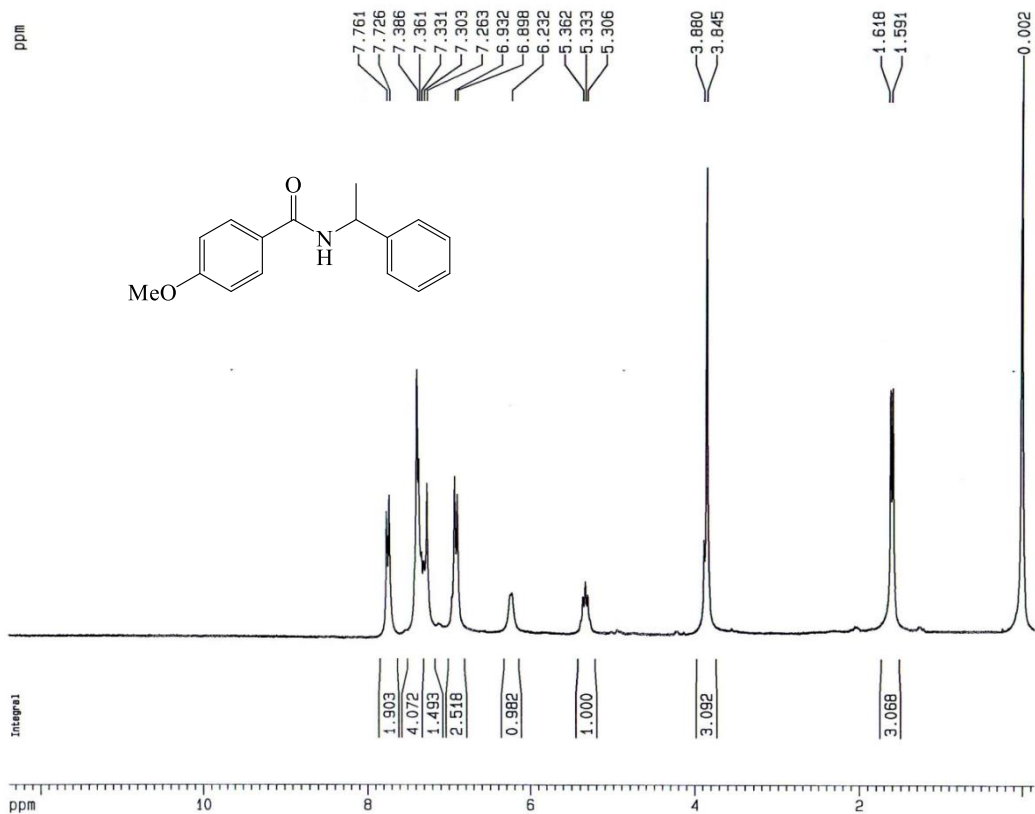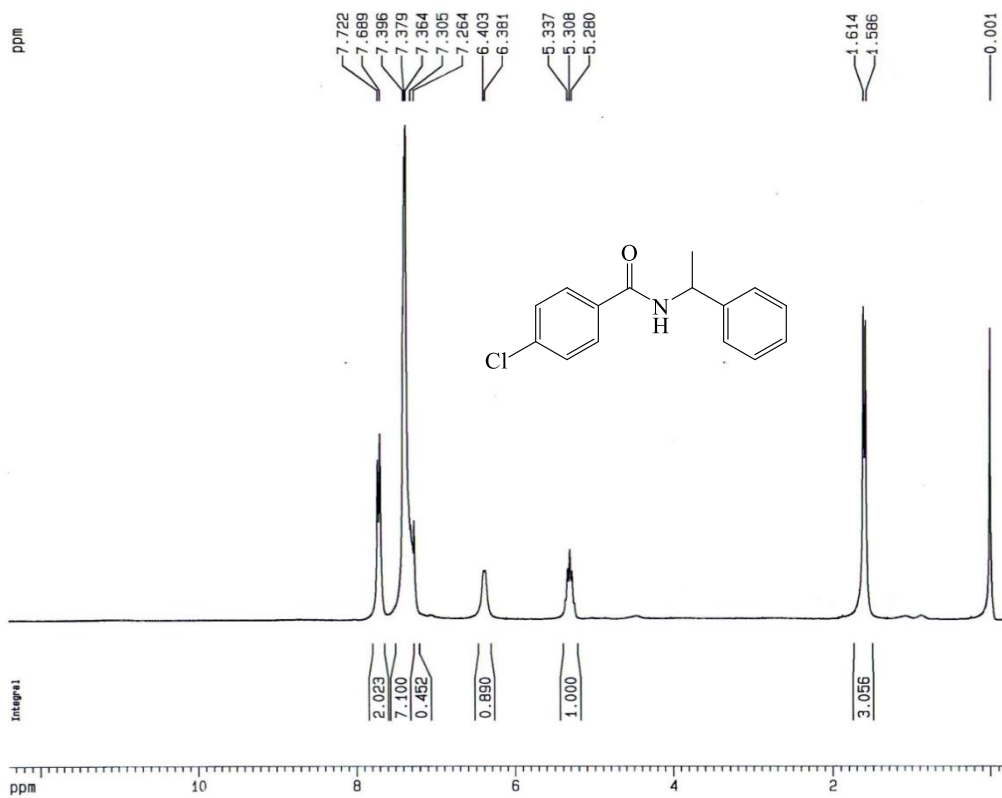

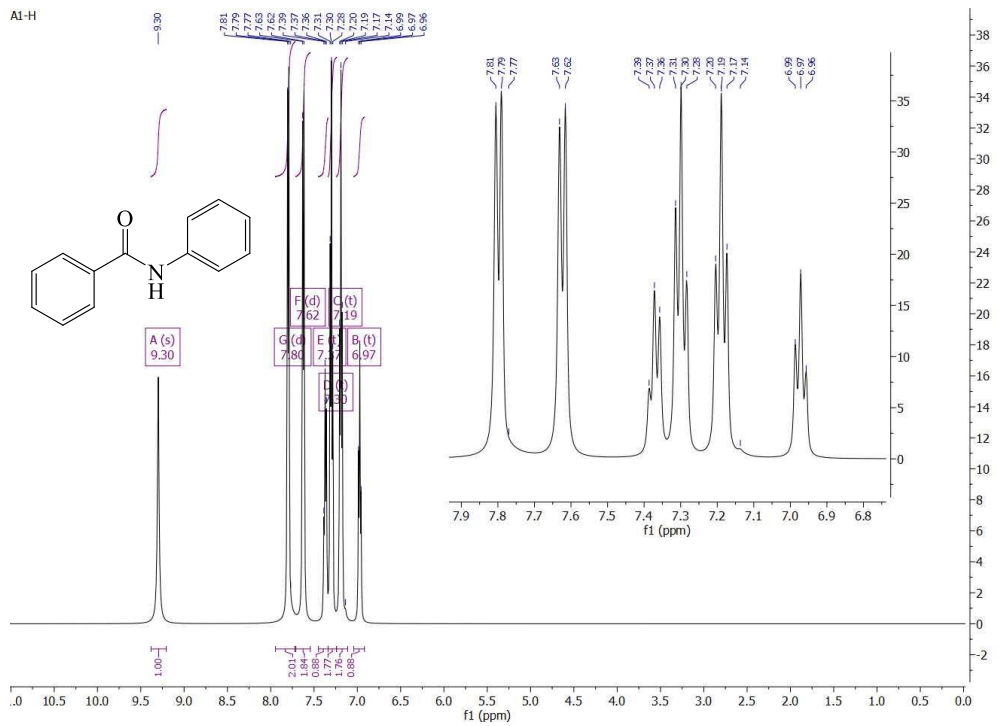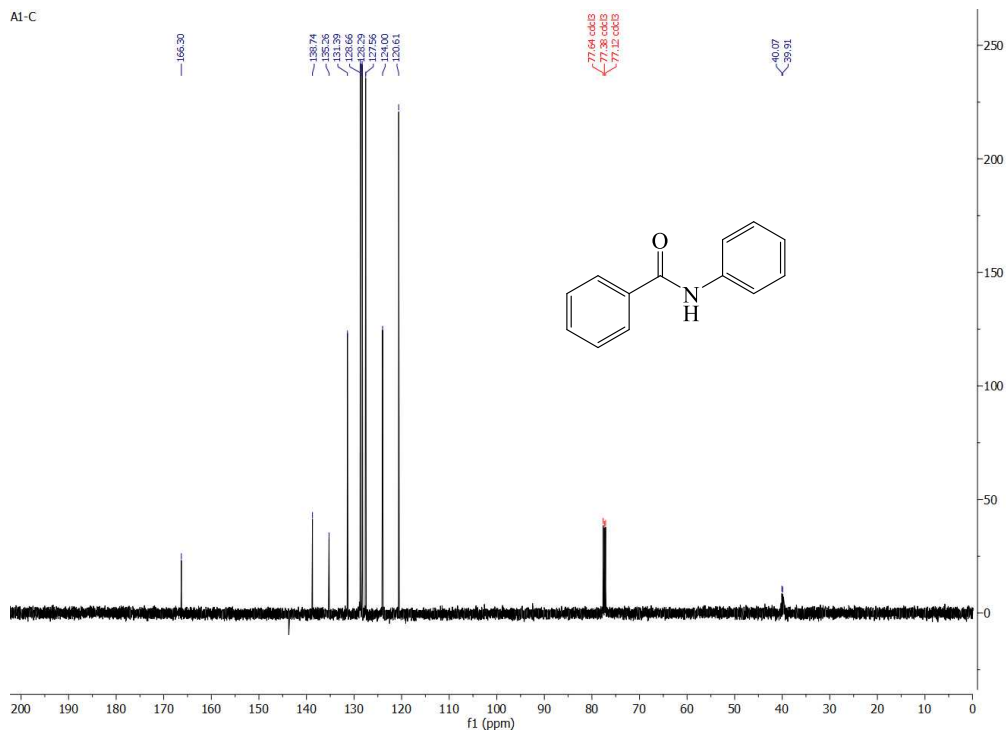

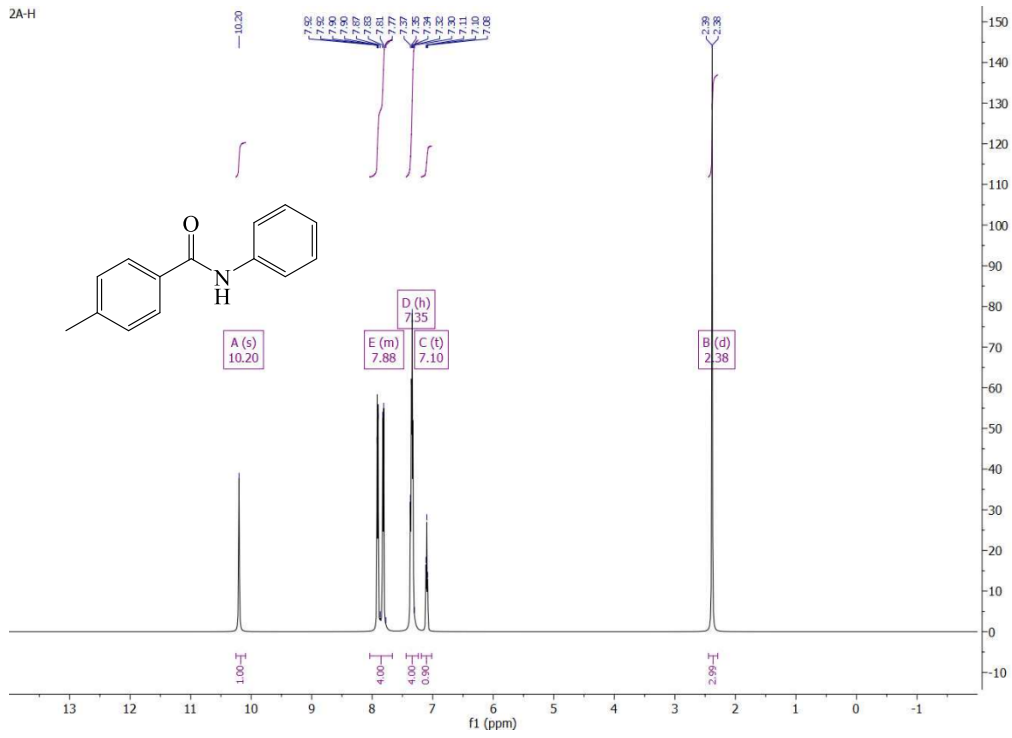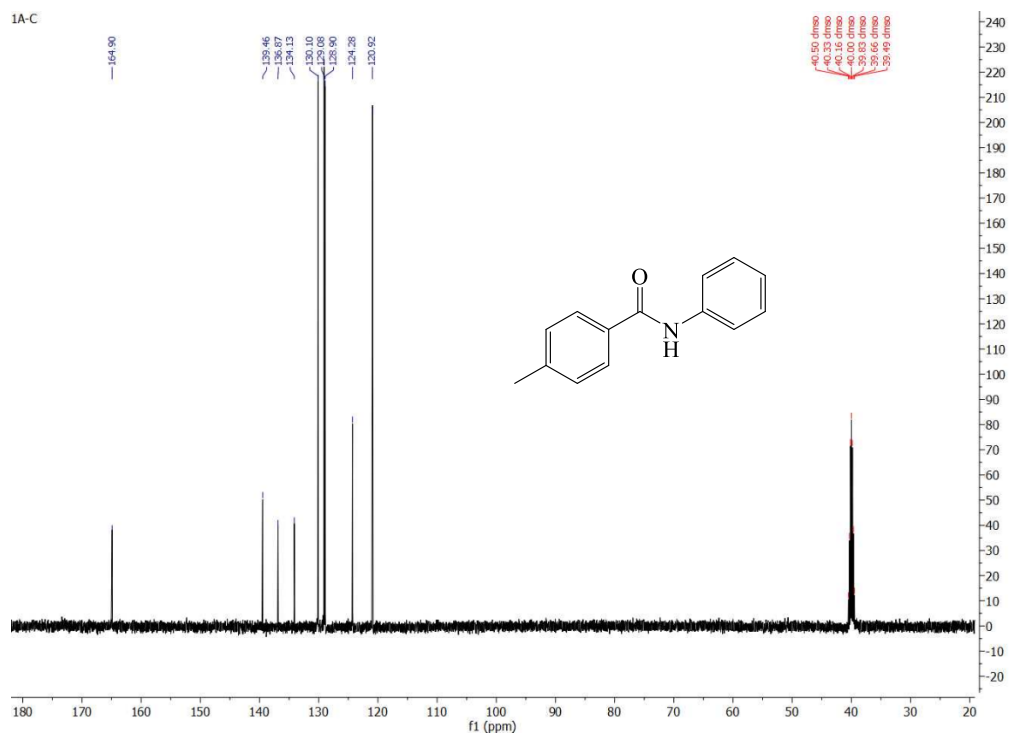

1A-H

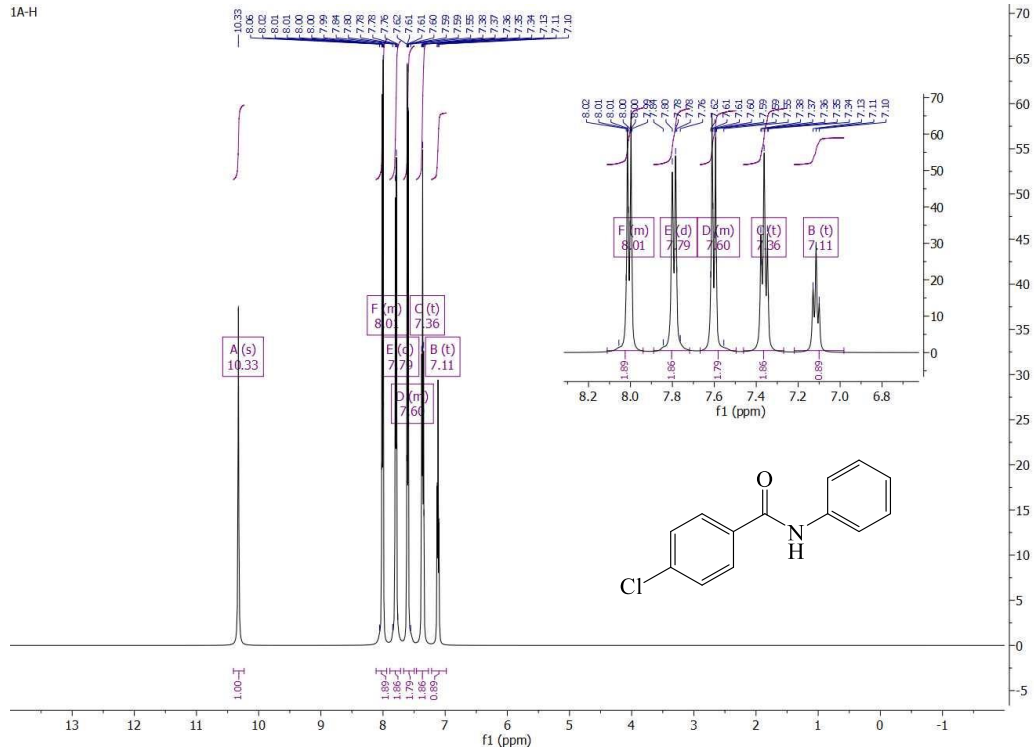

2A-C

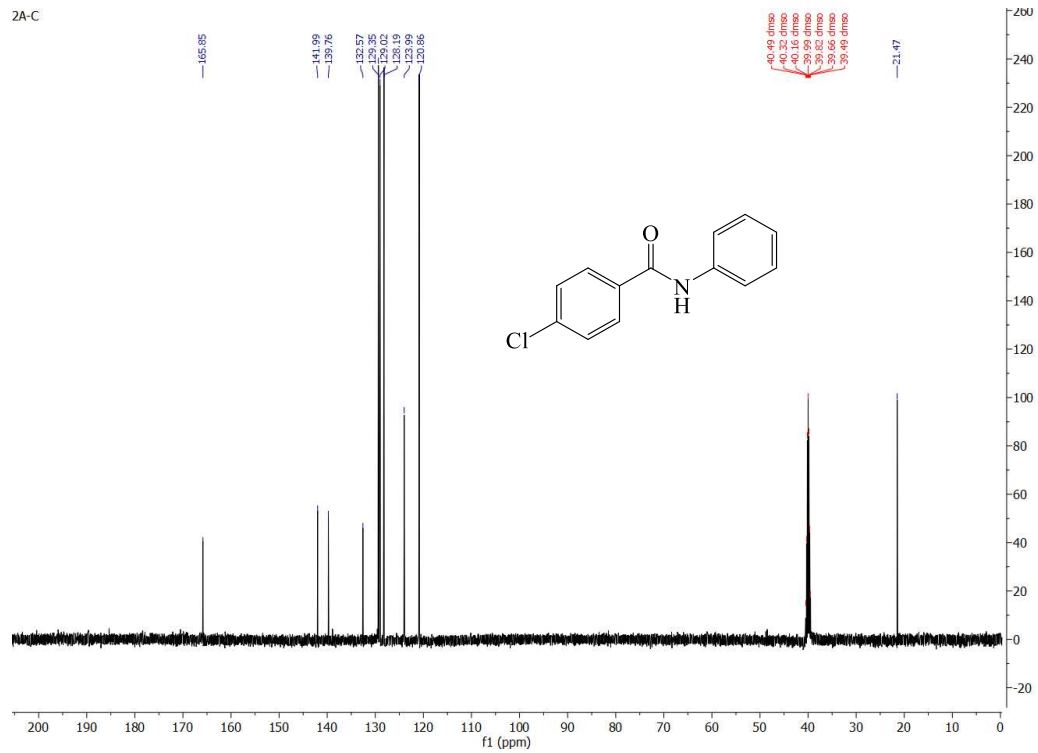



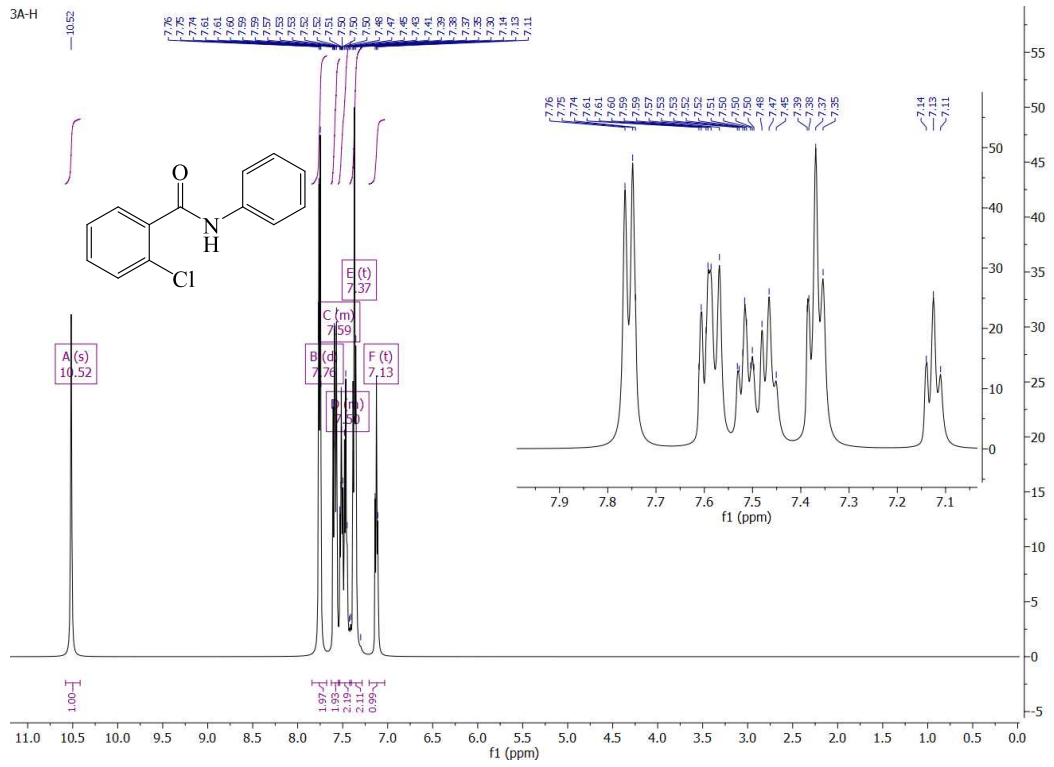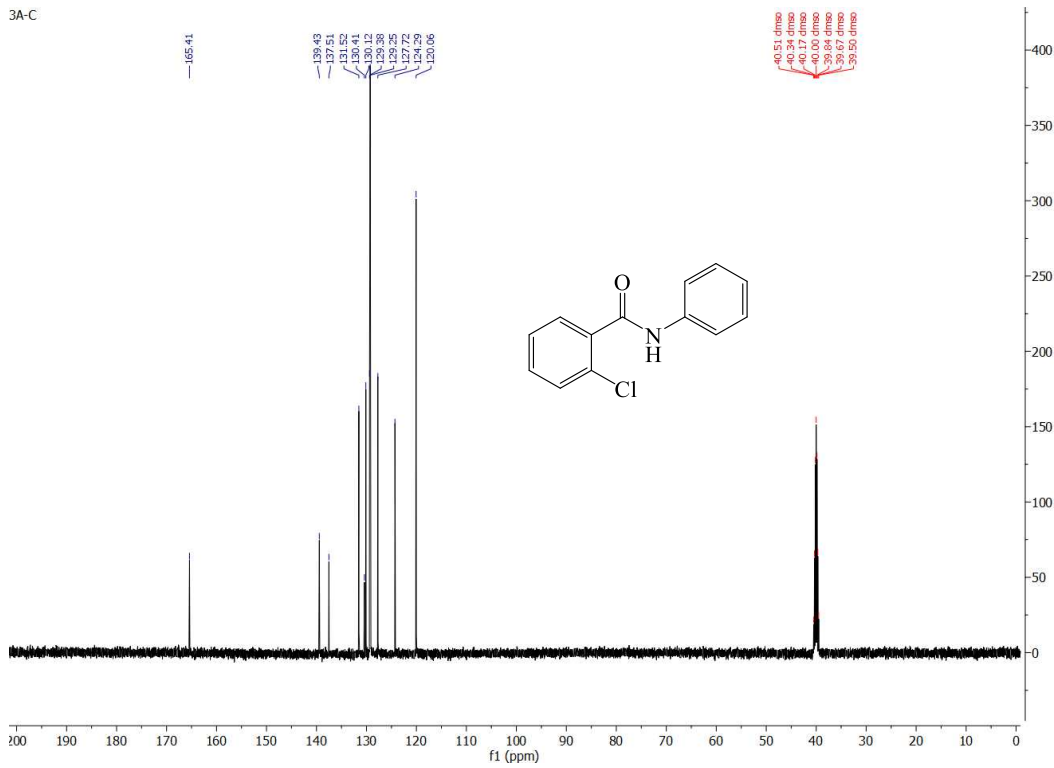

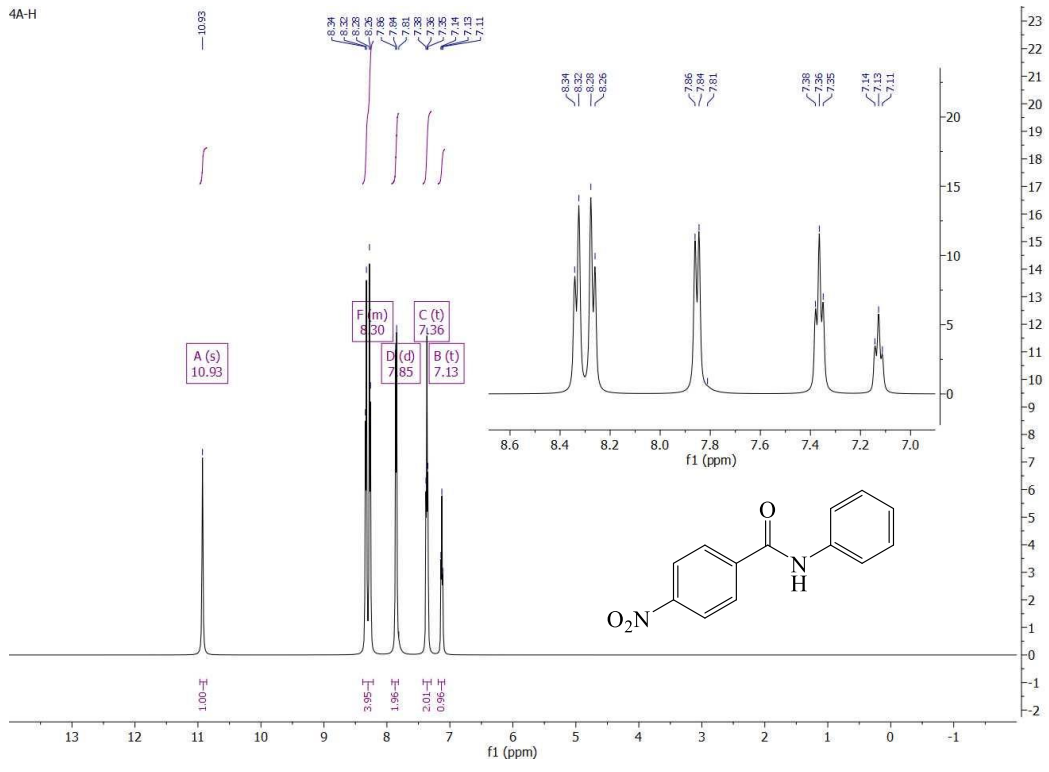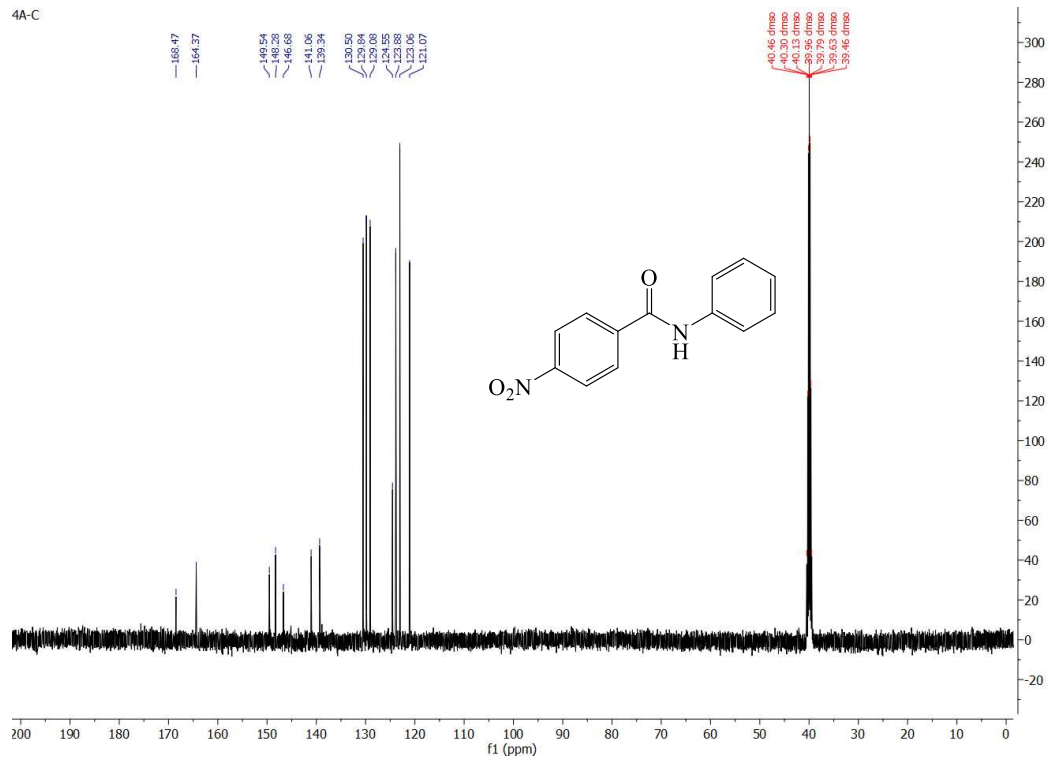

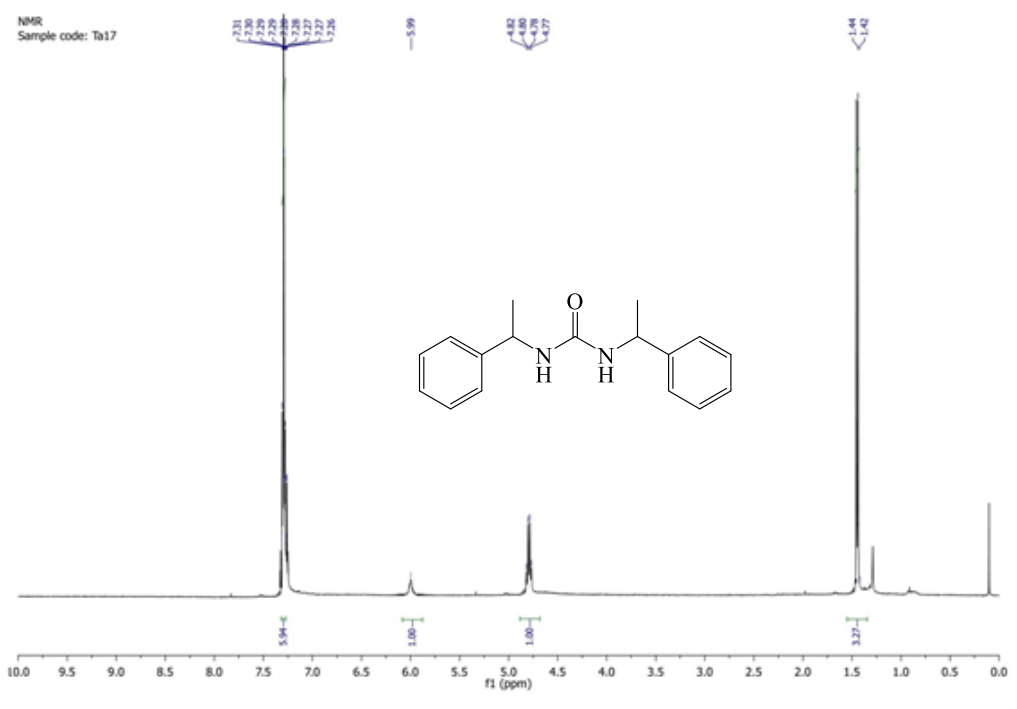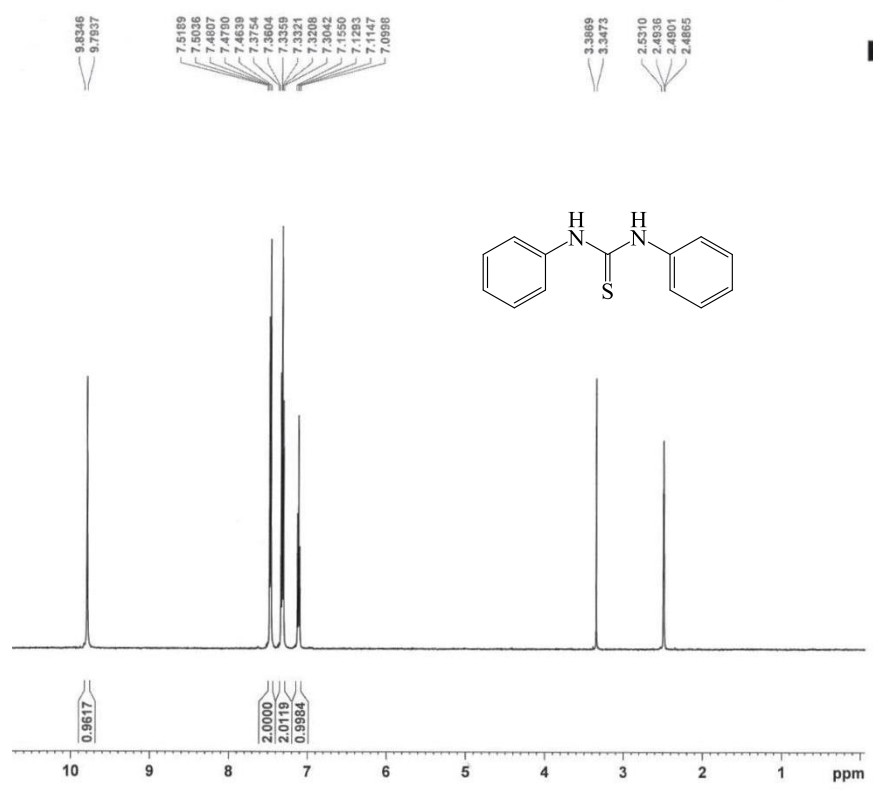

Supplement: d1ra09327d1.pdf [file d1ra09327d1.pdf]
